# Supplementary material for: Microwave-assisted intercalation: exploring electronic and structural features of metastable MMo6S8 (M = Ag, Sn)
Source: Royal Society of Chemistry journal article supplement (doi:10.1039/d4ma01090f), 2025-01-01
Supplement: d4ma01090f1.pdf [file d4ma01090f1.pdf]

Supplementary Information Submitted to *Materials Advances*

## **Microwave-Assisted Intercalation: Exploring Electronic and Structural Features of Metastable $\text{MMo}_6\text{S}_8$ ( $\text{M} = \text{Ag}, \text{Sn}$ )**

Rose E. Smiley<sup>1</sup>, Konstantina G. Mason<sup>1</sup>, Rose A. Lam<sup>1</sup>, Alice R. Giem,<sup>2</sup> Daniella Ingargiola<sup>1</sup>,  
Brian Wuille-Bille<sup>2</sup>, David Prendergast<sup>4</sup>, and Jesús M. Velázquez<sup>1</sup>.

<sup>1</sup> *Department of Chemistry, University of California, One Shields Avenue, Davis, California, 95616, USA.*

<sup>2</sup> *Department of Chemistry, Texas A&M University, College Station, TX 77843, USA.*

<sup>3</sup> *Department of Inorganic Spectroscopy, Max Planck Institute for Chemical Energy Conversion, Mülheim an der Ruhr, 45470, Germany.*

<sup>4</sup> *Molecular Foundry, Lawrence Berkely National Laboratory, Berkeley, California, 94720, USA.*

\*Corresponding authors: email: BWB: [brian.wuille-bille@cec.mpg.de](mailto:brian.wuille-bille@cec.mpg.de) DP: [dgprendergast@lbl.gov](mailto:dgprendergast@lbl.gov), and JMV: [jvelazquez@ucdavis.edu](mailto:jvelazquez@ucdavis.edu)

## XAS experiments and data analysis

### *Sample preparation*

Prior to acquiring data all sample powders were ground as fine as possible using a mortar and pestle and then to obtain the smallest particles a suspension was made with acetone. This suspension was then added drop wise to a glass slide and set to dry. The dried powder was carefully scraped and placed onto Kapton tape in the XAS sample holder.

### *XANES analysis*

XANES data was averaged in *Athena*<sup>1</sup> version 0.0.26. Processing of data was also performed in *Athena* including beam energy shift and the normalization of the pre and post edge regions. To analyze both the Mo L<sub>3</sub>-edge and S K-edge spectra, data was truncated ~ 50 eV after the S K-edge to separate overlapping edges and allow for separate analysis. Normalized spectra can be found in Figure 3 and the first derivatives of the Mo L<sub>3</sub>-edge can be found in Figure S6.

### *EXAFS analysis*

Mo K-edge EXAFS data was processed similarly to XANES with an additional step to remove the background for the Mo K-edge spectra. Once processed the data was imported into *Artemis* version 0.9.26. In the software data is fit with theoretical models from a .cif file from the Inorganic Crystal Structure Database (ICSD) using an IFEFFIT model to perform calculations.<sup>2</sup>

For the fit, amplitude reduction factors ( $S_0^2$ ) accounts for the multiple-electron excitations of the absorbing atom and was treated as set parameters and based on the appropriate metal references.<sup>3</sup> Debye-Waller factors ( $\sigma^2$ ) which correlate to the thermal motion of a system were defined as being the same for any pathways with similar bonding environments and left as a floating parameter.  $\Delta E_0$  accounts for the relative difference between the edge position of the elements and the edge position from the FEFF calculation and was left as a floating parameter. Experimental  $E_0$  can be seen as the first derivative of the Mo K-edge plot shown in Figure S9. All parameter details extracted from the fit shown in Figure 4 are in Table S3 and Table S4. The normalized first derivative for the Mo K-edge can be found in Figure S10. The data and fit is also represented in k-space in Figure S10. Extracted Mo-Mo<sub>intra</sub> path lengths were used to calculate % anisotropy and the associated error according to equation 1 and equation 2.<sup>4</sup>

## Computational details from collaborators

Bader charges of  $\text{AgMo}_6\text{S}_8$ ,  $\text{SnMo}_6\text{S}_8$ ,  $\text{CuMo}_6\text{S}_8$ , and  $\text{Cu}_2\text{Mo}_6\text{S}_8$  were calculated using the Bader Charge Analysis Code.<sup>5-8</sup> The charge calculated for each intercalated cation is the difference between the valence charge in the pseudopotential for each element and their Bader valence charge.

MBXAS spectra were calculated according to the method outlined in.<sup>9</sup> In short, for a given elemental X-ray absorption edge (S in this case), we use density functional theory (DFT) to calculate the set of ground state and core-excited state Kohn-Sham (KS) orbitals – these are the outputs of two separate self-consistent field DFT calculations: one regular DFT calculation and the other employing a modified pseudopotential to introduce the core-excitation on a specific (S) atom. This process is repeated for each potentially excited atom within a supercell model of the condensed phase system under periodic boundary conditions – the supercell must be sufficiently large ( $\geq 1\text{nm}$  in linear dimension) to reduce the periodic interactions between the core-excited atoms. With these two sets of KS orbitals, we model the many-electron states as single Slater determinants – the ground state constructed from the occupied electronic orbitals and the core-excited states constructed from various configurations of that set of orbitals, typically including single electron-hole pair excitations involving the core-hole. X-ray absorption transition probabilities are calculated using the electric field dipole operator between the ground and core-excited states. Specifically, within the MBXAS formalism, there are contributions to the excitation intensity that can be viewed as originating from the polarization response of the occupied valence electrons to the core excitation, as outlined in more recent work on the MBXAS method defined within the core-excited orbital basis.<sup>10</sup> Simulated spectra have a final rigid shift applied to their excitation energies to match with experimental measurements – the pseudopotential model for the core-excited atoms does not accurately capture the core-excitation energy. However, this alignment is only performed once for all excited atoms of the same element and relative excitation energies between symmetry-distinct atoms (so-called chemical shifts) are captured within the method at the accuracy of DFT formation energy differences.

**Table S1.** Lattice parameters from Rietveld Refinement.

| <b>Parameter</b>                                   | <b>AgMo<sub>6</sub>S<sub>8</sub></b> | <b>SnMo<sub>6</sub>S<sub>8</sub></b> |
|----------------------------------------------------|--------------------------------------|--------------------------------------|
| R <sub>wp</sub> (%)                                | 14.596                               | 11.074                               |
| MMo <sub>6</sub> S <sub>8</sub> R <sub>f</sub> (%) | 4.385                                | 5.284                                |
| Mo <sub>6</sub> S <sub>8</sub> R <sub>f</sub> (%)  | 4.809                                | 4.907                                |
| A (Å)                                              | 9.272                                | 9.304                                |
| C (Å)                                              | 11.181                               | 10.839                               |
| Vol. (Å <sup>3</sup> )                             | 832.528                              | 812.619                              |

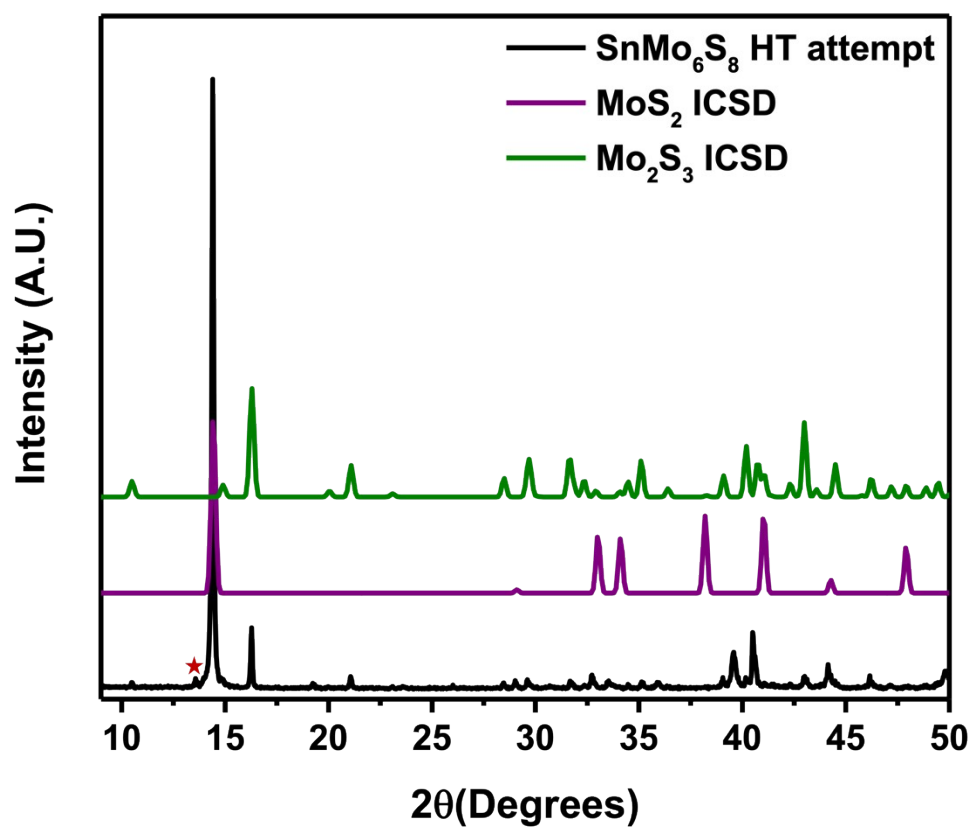

**Figure S1.** PXRD pattern of a high temperature microwave-assisted solid-state synthesis attempt showing major phases as  $\text{MoS}_2$  and  $\text{Mo}_2\text{S}_3$ . The small star indicates the (101) peak associated with  $\text{SnMo}_6\text{S}_8$ .

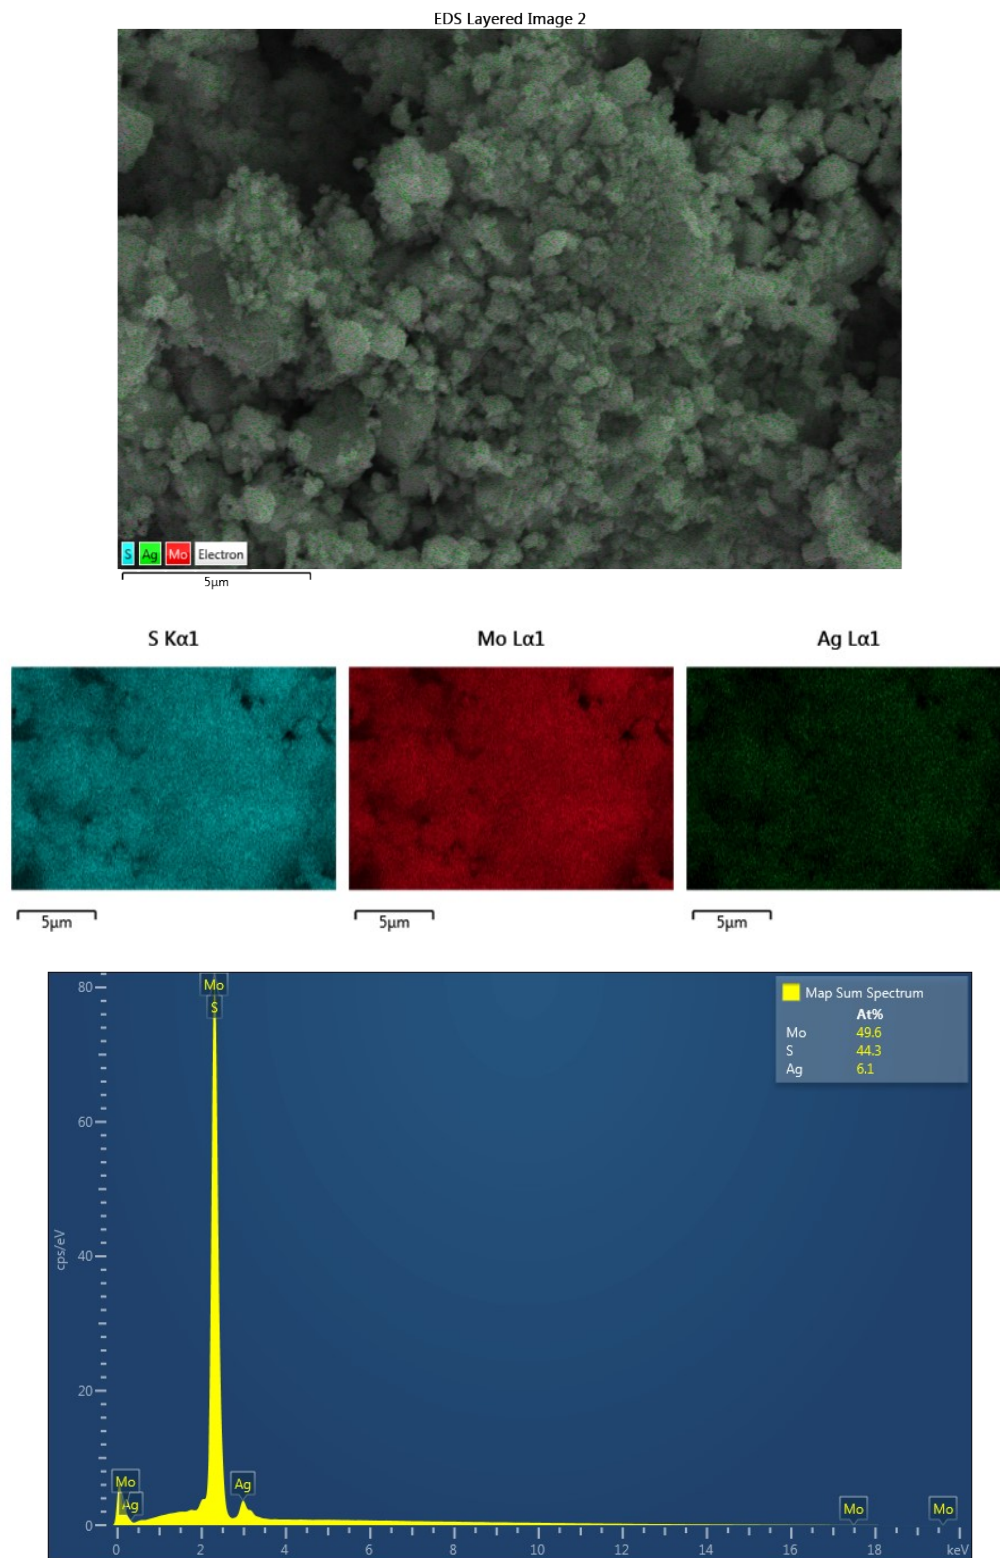

**Figure S2.** EDS Map sum spectra of  $\text{AgMo}_6\text{S}_8$  shows homogeneous distribution of Ag throughout CP particles

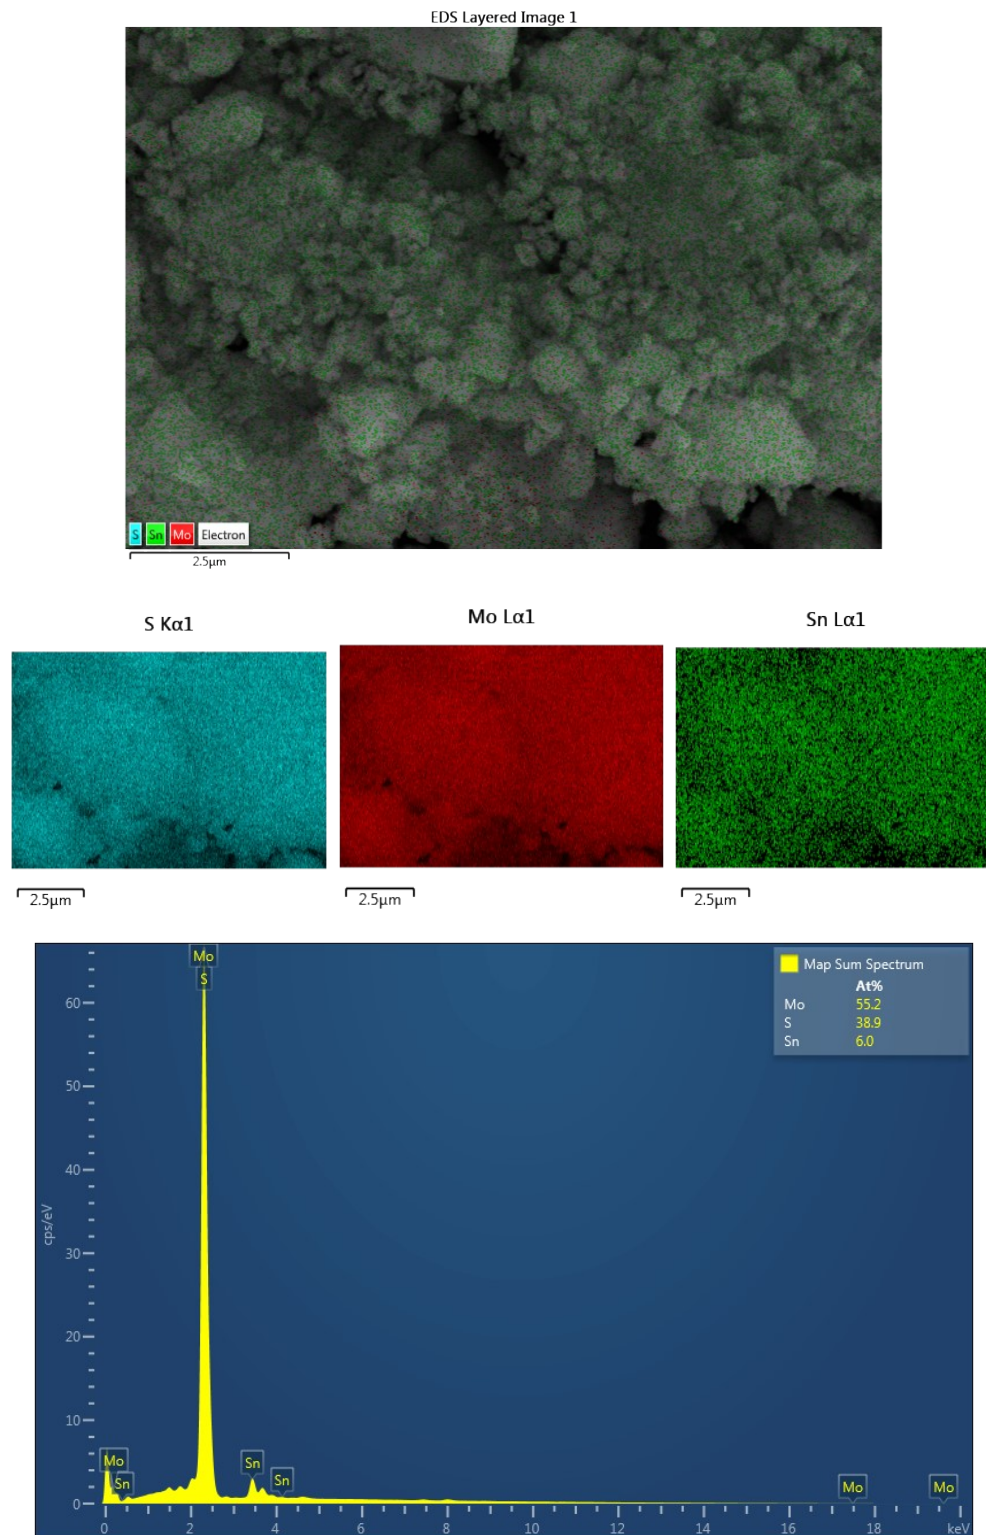

**Figure S3.** EDS map sum spectra of  $\text{SnMo}_6\text{S}_8$  shows homogeneous distribution of Sn throughout CP particles.

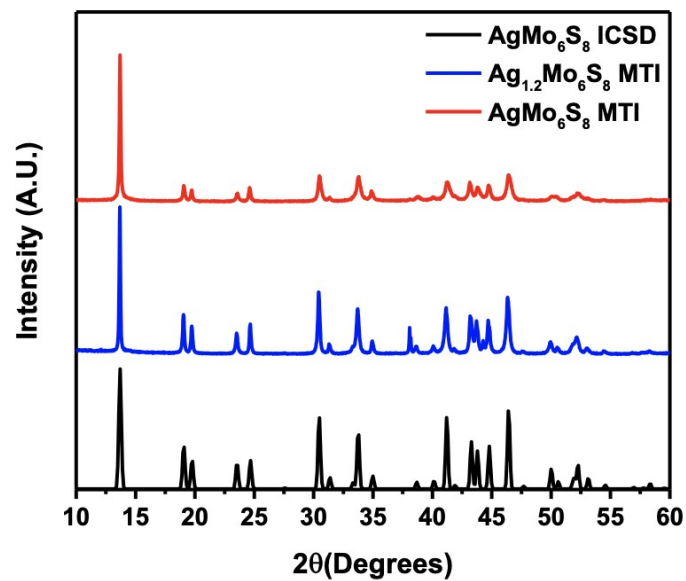

**Figure S4.** PXRD of  $\text{AgMo}_6\text{S}_8$  with varying amounts of Ag content.

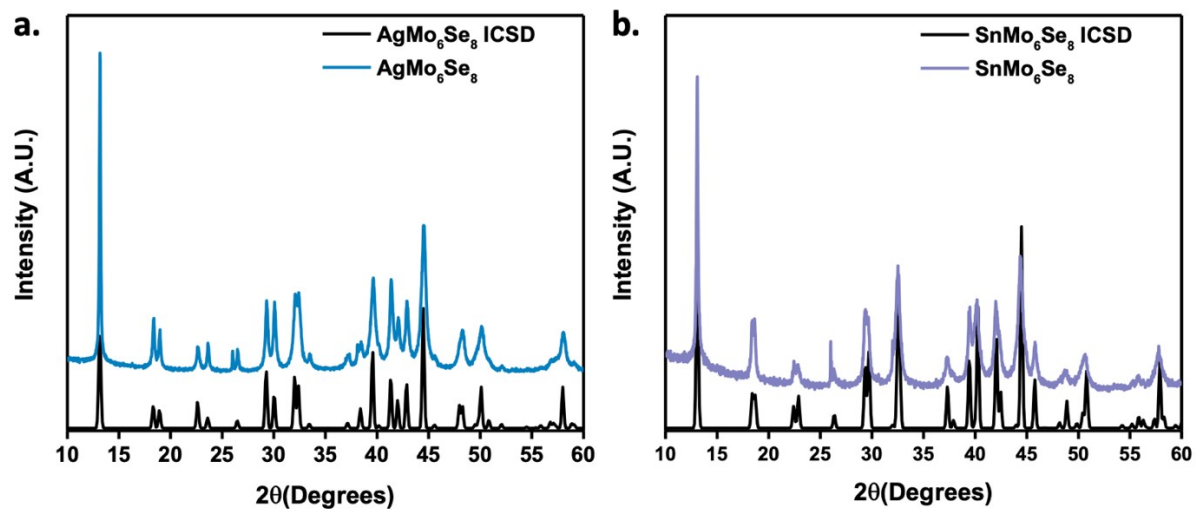

**Figure S5.** PXRD of a.)  $\text{AgMo}_6\text{Se}_8$  and b.)  $\text{SnMo}_6\text{Se}_8$ .



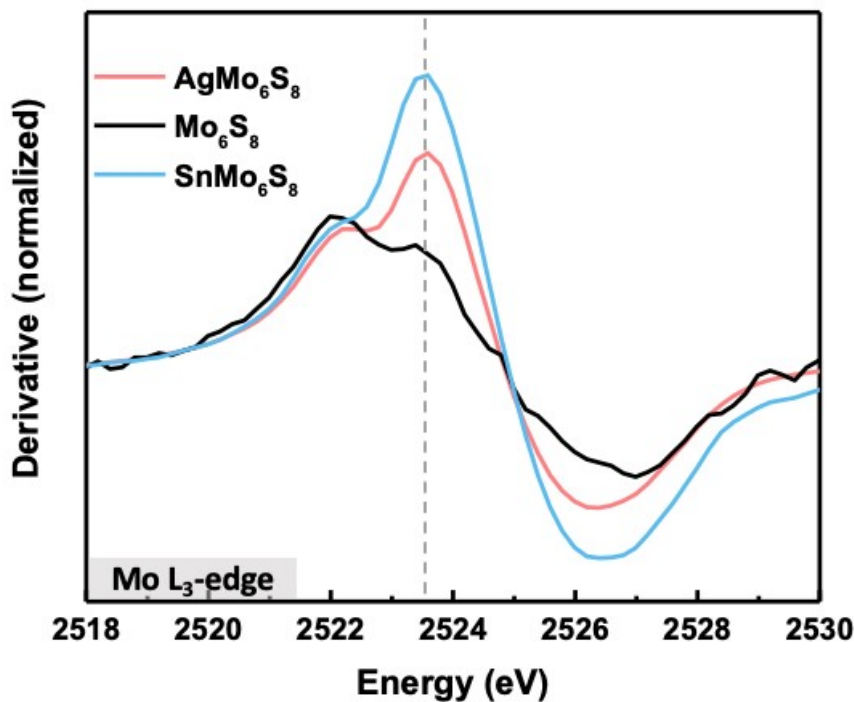

**Figure S6.** Mo L<sub>3</sub>-edge plotted as normalized first derivative with dashed lines indicating peak maxima.

**Table S2.** Calculated Bader charges on intercalated metal cation in AgMo<sub>6</sub>S<sub>8</sub>, SnMo<sub>6</sub>S<sub>8</sub>, CuMo<sub>6</sub>S<sub>8</sub>, and Cu<sub>2</sub>Mo<sub>6</sub>S<sub>8</sub>. For Ag and Cu about half an electron is donated per metal intercalant is donated to the Mo<sub>6</sub>S<sub>8</sub> cluster resulting in assigned oxidation state +1. Sn donates more electrons to the Mo<sub>6</sub>S<sub>8</sub> cluster resulting in assigned oxidation state +2.

| Chevrel Phase                                       | Bader Charge | Oxidation State |
|-----------------------------------------------------|--------------|-----------------|
| AgMo <sub>6</sub> S <sub>8</sub> (Ag)               | +0.49        | +1              |
| SnMo <sub>6</sub> S <sub>8</sub> (Sn)               | +0.93        | +2              |
| CuMo <sub>6</sub> S <sub>8</sub> (Cu)               | +0.60        | +1              |
| Cu <sub>2</sub> Mo <sub>6</sub> S <sub>8</sub> (Cu) | +0.57        | +1              |

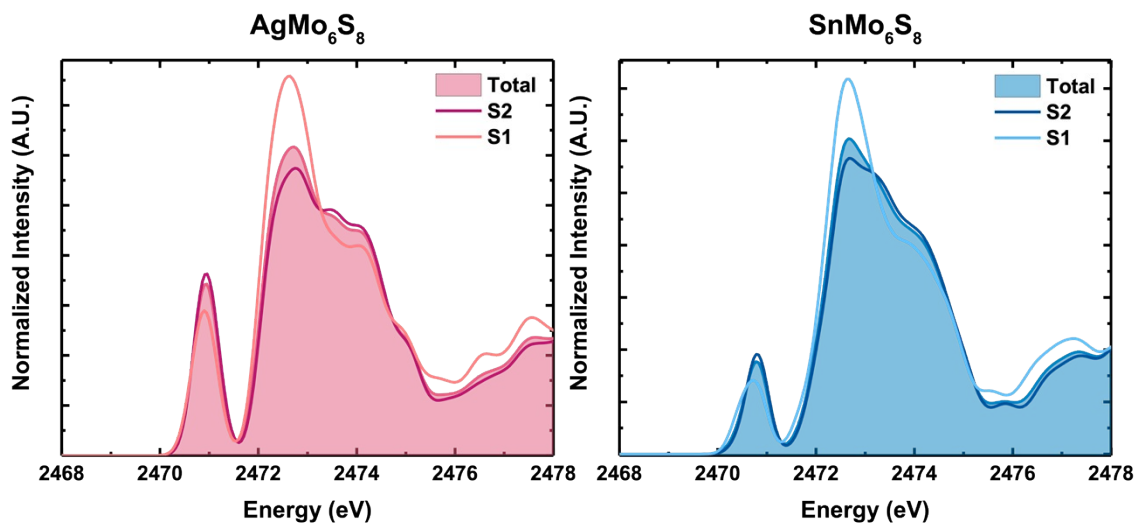

**Figure S7.** Calculated sulfur K-edge spectra of  $\text{AgMo}_6\text{S}_8$  and  $\text{SnMo}_6\text{S}_8$  for S1, S2, and total contribution.

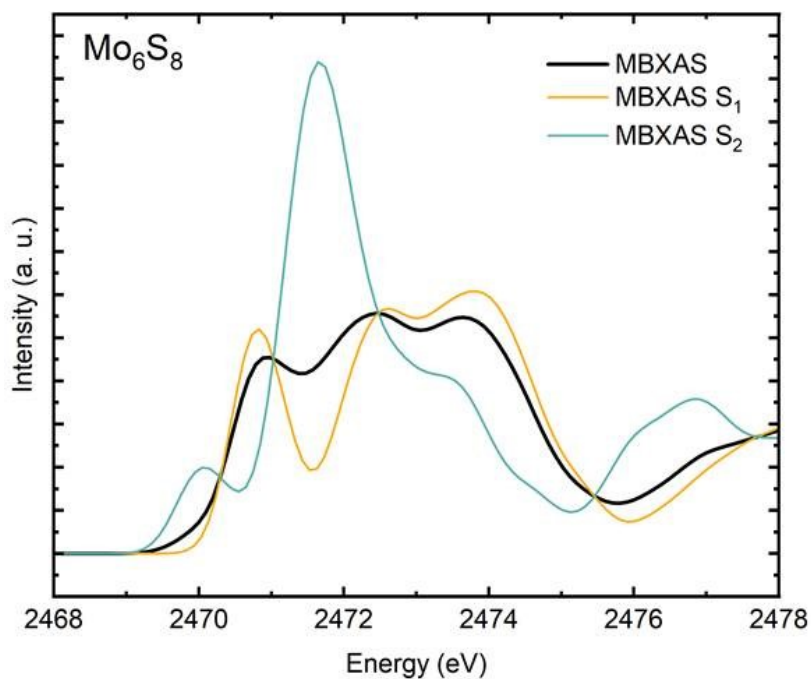

**Figure S8.** Calculated sulfur K-edge spectra of  $\text{Mo}_6\text{S}_8$  for S1, S2, and total sulfur contribution reproduced from Hyler et. al with permission.<sup>11</sup>

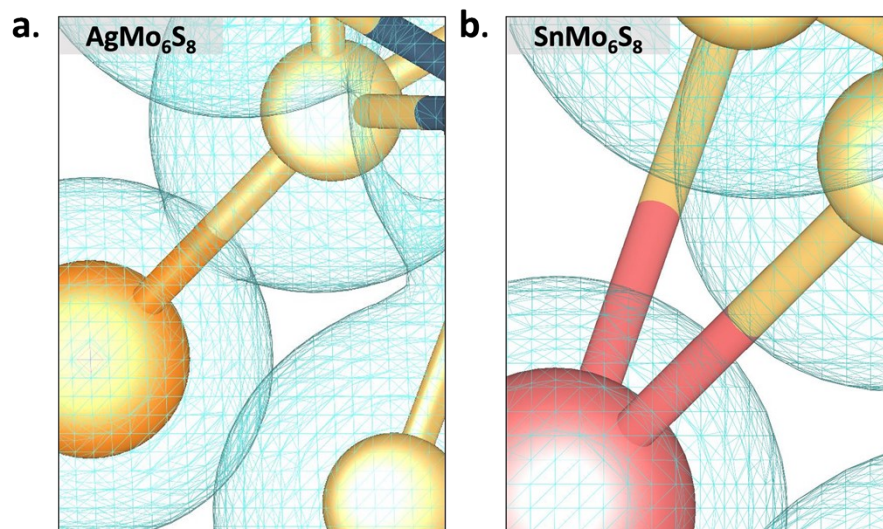

**Figure S9.** Close up visual representations of electron density for specific isosurface values surrounding a.) Ag in  $\text{AgMo}_6\text{S}_8$  and b.) Sn in  $\text{SnMo}_6\text{S}_8$ .

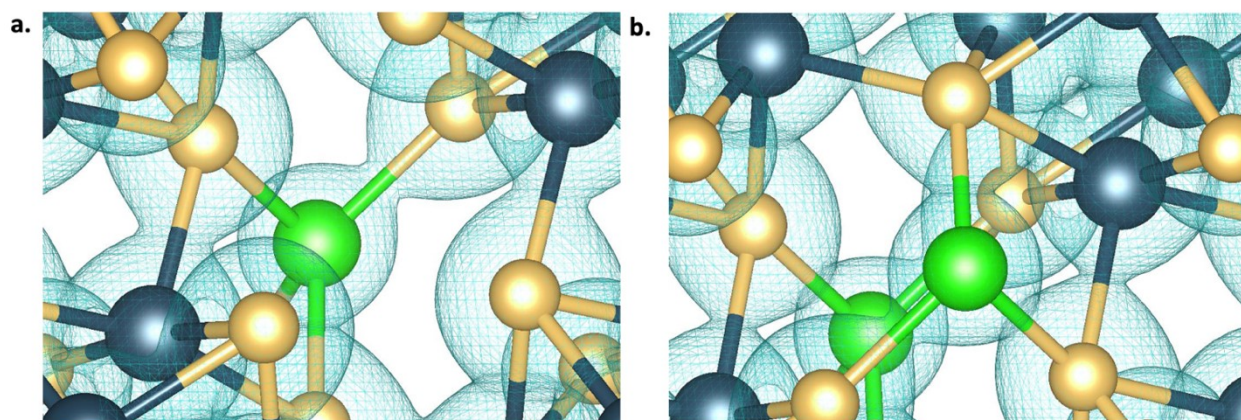

**Figure S10.** Visual representation of isosurface values for a.)  $\text{CuMo}_6\text{S}_8$  and b.)  $\text{Cu}_2\text{Mo}_6\text{S}_8$ .

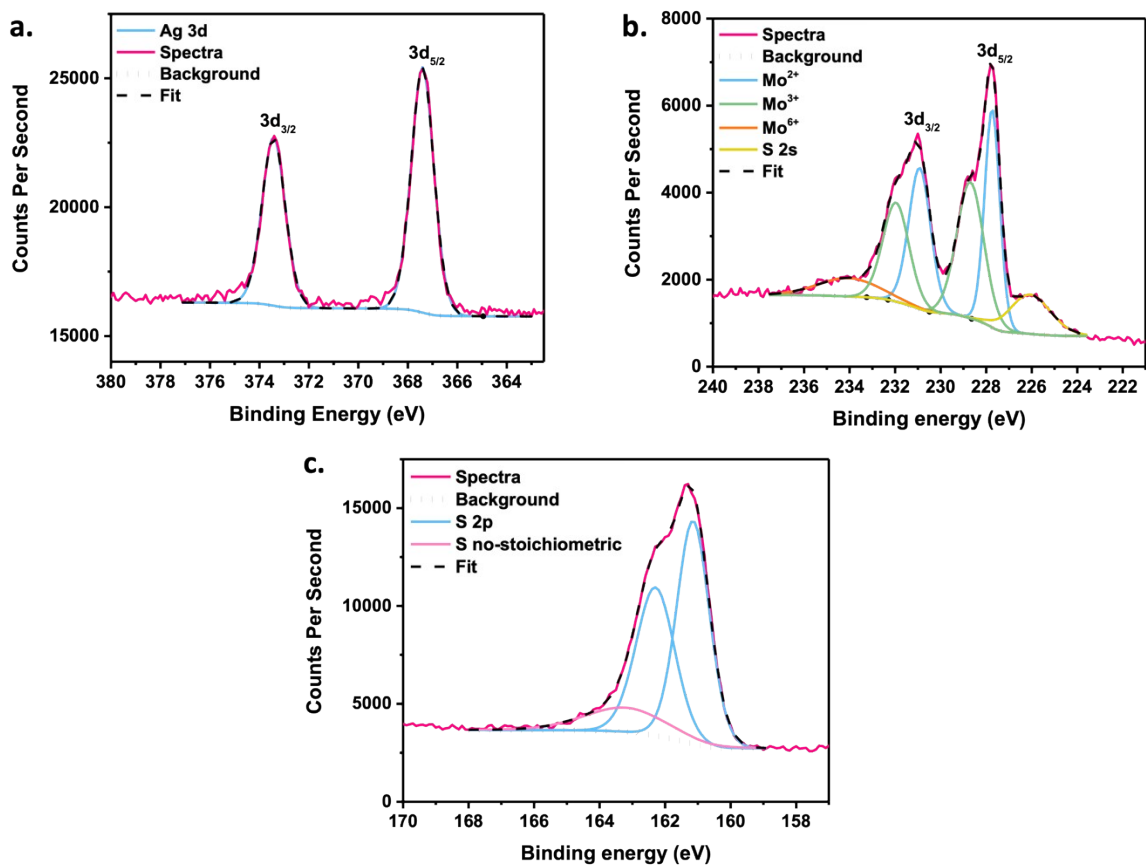

**Figure S11.** XPS for AgMo<sub>6</sub>S<sub>8</sub> with a.) Ag 3d spectra, b.) Mo 3d spectra and c.) S 2p spectra/ Mo 3d and S 2p spectra are in good agreement with previously published CP XPS data. Mo<sup>6+</sup> is a result of a native oxide layer consistently seen in CPs.

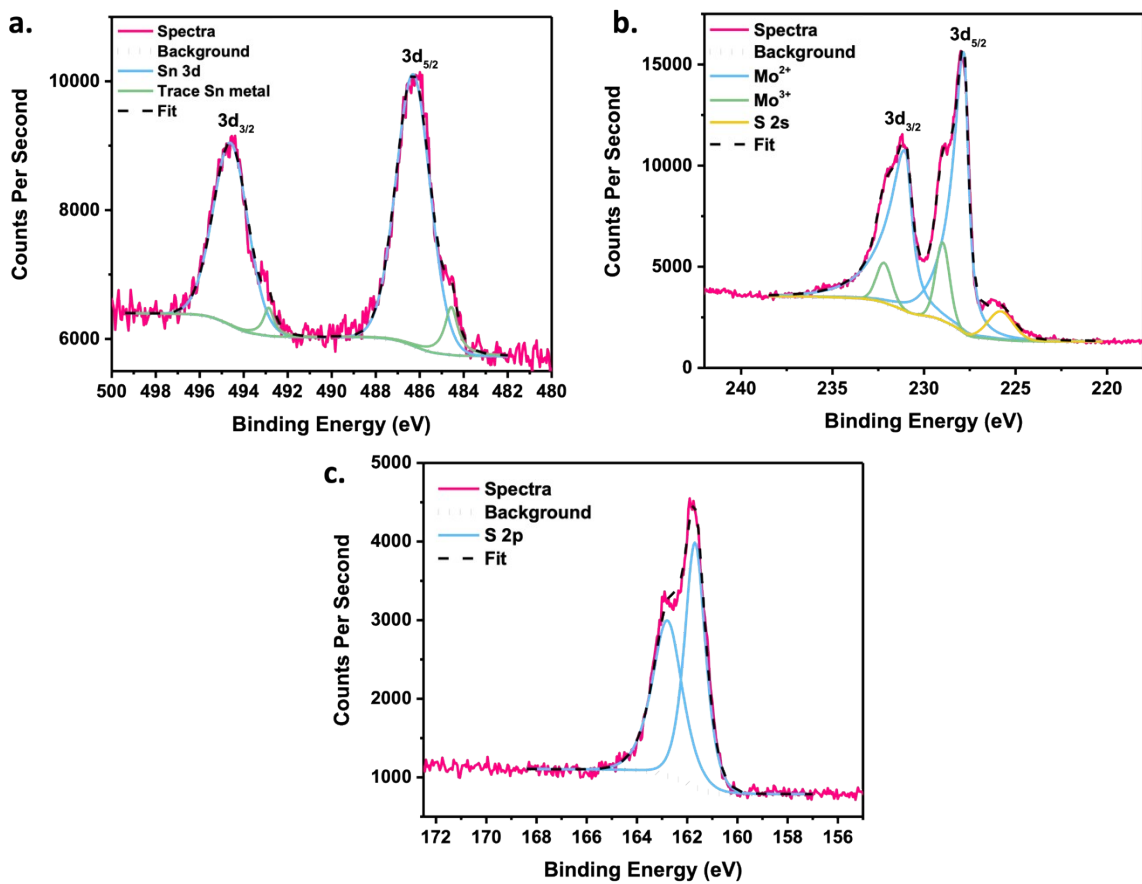

**Figure S12.** XPS for  $SnMo_6S_8$  with a.) Sn 3d spectra, b.) Mo 3d spectra, and c.) S 2p spectra. Mo 3d and S 2p spectra are in good agreement with previously published CP XPS data. No  $Mo^{6+}$  is seen as etching prior to data collection was performed at a higher voltage.

**Table S3.** Fitting parameters for the Mo K-edge of SnMo<sub>6</sub>S<sub>8</sub>.  $S_0^2$  is the amplitude factor,  $\Delta E_0$  is the energy offset of the white line between the  $E_0$  from table SX and that calculated by FEFF,  $\sigma^2$  is the Debye-Waller Factor, N is the scattering pathway degeneracy. The distances obtained by the EXAFS analysis are listed as absorber-scatterer pairs.

| Chevrel-phase                    | Parameter              | Value      | R-factor   |
|----------------------------------|------------------------|------------|------------|
| SnMo <sub>6</sub> S <sub>8</sub> | $S_0^2$                | .85        | set        |
|                                  | $\Delta E_0$           | 0.53       | +/- 0.651  |
|                                  | $\sigma_{\text{Mo}}^2$ | 0.005      | +/- 0.0004 |
|                                  | $\sigma_{\text{S}}^2$  | 0.003      | +/- 0.001  |
|                                  | Mo-S1                  | 2.39 Å     | +/- 0.003  |
|                                  | Mo-S2                  | 2.45 Å     | +/- 0.003  |
|                                  | Mo-Mo1                 | 2.67 Å     | +/- 0.004  |
|                                  | Mo-Mo2                 | 2.72 Å     | +/- 0.004  |
|                                  | Mo-Mo3                 | 3.17 Å     | +/- 0.07   |
|                                  | N (Mo-S1)              | 1          | set        |
|                                  | N (Mo-S2)              | 2.92       | +/- 0.291  |
|                                  | N (Mo-Mo1)             | 2          | set        |
|                                  | N (Mo-Mo2)             | 2          | set        |
|                                  | N (Mo-Mo3)             | 1          | set        |
|                                  | R-range                | 1.25 – 4 Å | set        |
| k-range                          | 3 – 13.9 Å             | set        |            |
|                                  |                        |            | 0.0162765  |

**Table S4.** Fitting parameters for the Mo K-edge of AgMo<sub>6</sub>S<sub>8</sub>.

| Chevrel-phase                    | Parameter                    | Value      |           | R-factor  |
|----------------------------------|------------------------------|------------|-----------|-----------|
| AgMo <sub>6</sub> S <sub>8</sub> | S <sub>0</sub> <sup>2</sup>  | .85        | set       | 0.0189861 |
|                                  | ΔE <sub>0</sub>              | 2.11       | +/- 0.633 |           |
|                                  | σ <sub>Mo</sub> <sup>2</sup> | 0.007      | +/- 0.001 |           |
|                                  | σ <sub>S</sub> <sup>2</sup>  | 0.002      | +/- 0.001 |           |
|                                  | Mo-S1                        | 2.42 Å     | +/- 0.007 |           |
|                                  | Mo-S2                        | 2.48 Å     | +/- 0.007 |           |
|                                  | Mo-Mo1                       | 2.70 Å     | +/- 0.002 |           |
|                                  | Mo-Mo2                       | 2.79 Å     | +/- 0.002 |           |
|                                  | Mo-Mo3                       | 3.15 Å     | +/- 0.002 |           |
|                                  | N (Mo-S1)                    | 3.4        | +/- 0.318 |           |
|                                  | N (Mo-S2)                    | 1          | set       |           |
|                                  | N (Mo-Mo1)                   | 2          | set       |           |
|                                  | N (Mo-Mo2)                   | 2          | set       |           |
|                                  | N (Mo-Mo3)                   | 1          | set       |           |
|                                  | R-range                      | 1.25 – 4 Å | set       |           |
|                                  | k-range                      | 3 – 13.9 Å | set       |           |

## Error of cluster anisotropy equation

Anisotropy of the  $\text{Mo}_6$  cluster was calculated according to equations previously detailed by Levi and Aurbach<sup>4</sup> using the difference between  $R_{\text{long}}$  and  $R_{\text{short}}$ .

### Equation 1:

$$\% \text{ Anisotropy} = ((R_{\text{long}} - R_{\text{short}})/R_{\text{long}}) * 100$$

### Equation 2:

$$\Delta \text{Anisotropy} = \sqrt{((R_{\text{short}}/R_{\text{long}}) * 100 * \Delta R_{\text{long}})^2 + ((-100/R_{\text{long}}) * \Delta R_{\text{short}})^2}$$

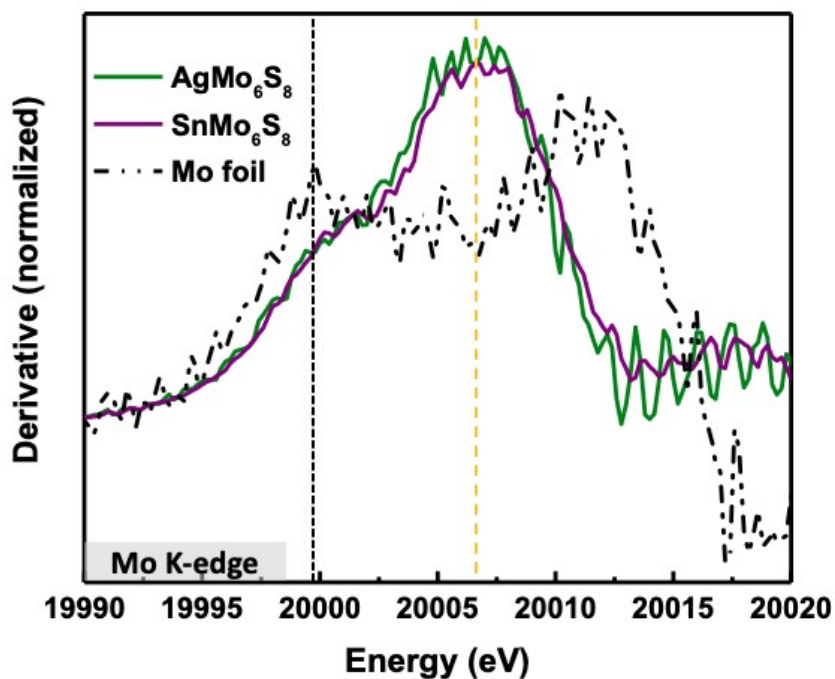

**Figure S13.** Mo K-edge plotted as the normalized first derivative with dashed lines indicating peak maxima.



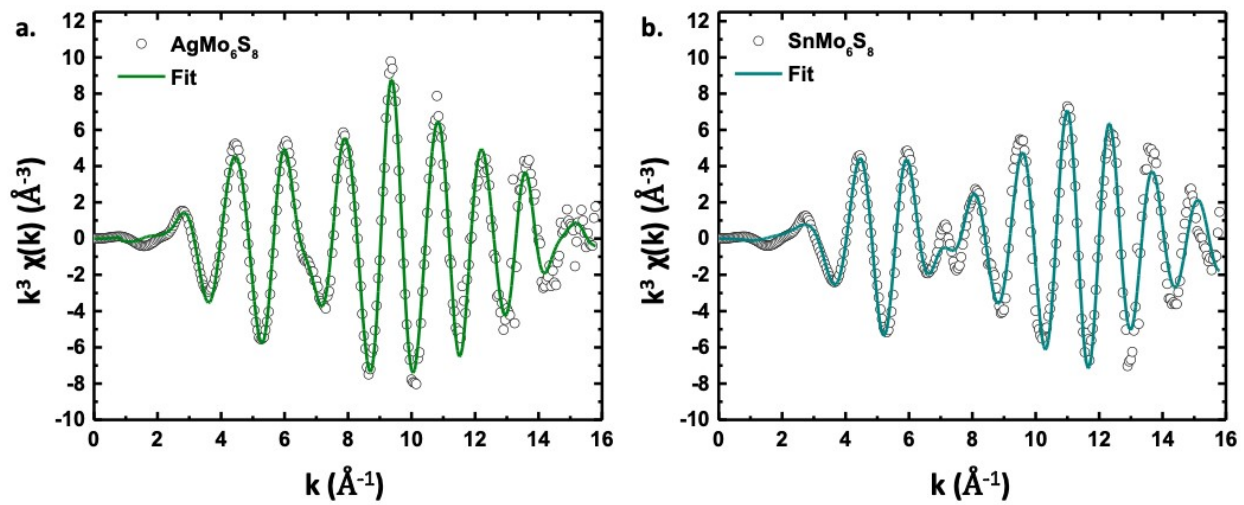

Figure S14. Mo K-edge data and fits in k-space for a.)  $\text{AgMo}_6\text{S}_8$  and b.)  $\text{SnMo}_6\text{S}_8$

## Atomic structures used for FEFF calculations and Rietveld Refinement

### AgMo<sub>6</sub>S<sub>8</sub>

#(C) 2023 by FIZ Karlsruhe - Leibniz Institute for Information Infrastructure. All rights reserved.

data\_600661-ICSD

\_database\_code\_ICSD 600661

\_audit\_creation\_date 2020-08-01

\_chemical\_name\_common 'Silver molybdenum(II/III) sulfide (1/6/8)'

\_chemical\_formula\_structural 'Ag Mo6 S8'

\_chemical\_formula\_sum 'Ag1 Mo6 S8'

\_chemical\_name\_structure\_type Chevrel#Mo6PbS8

\_exptl\_crystal\_density\_diffn 5.77

\_citation\_title

;

Chalcogen ordering on special-positions sites in ternary molybdenum  
chalcogenides

;

\_publ\_section\_comment 'Cell and Type only determined'

loop\_

\_citation\_id

\_citation\_journal\_full

\_citation\_year

\_citation\_journal\_volume

\_citation\_page\_first

\_citation\_page\_last

\_citation\_journal\_id ASTM

primary 'Inorganic Chemistry' 1983 22 3773 3776 INOCAJ

loop\_

\_citation\_author\_citation\_id

\_citation\_author\_name

primary 'Johnson, David C.'

primary 'Tarascon, Jean-Marie'

primary 'Sienko, M.J.'

\_cell\_length\_a 9.31

\_cell\_length\_b 9.31

\_cell\_length\_c 10.82

\_cell\_angle\_alpha 90.

\_cell\_angle\_beta 90.

\_cell\_angle\_gamma 120.

\_cell\_volume 812.19

\_cell\_formula\_units\_Z 3

\_space\_group\_name H-M\_alt 'R -3 H'

\_space\_group\_IT\_number 148

loop\_

\_space\_group\_symop\_id

\_space\_group\_symop\_operation\_xyz

1 'x-y, x, -z'

2 'y, -x+y, -z'

3 '-x, -y, -z'

4 '-x+y, -x, z'

5 '-y, x-y, z'

6 'x, y, z'

7 'x-y+2/3, x+1/3, -z+1/3'

8 'y+2/3, -x+y+1/3, -z+1/3'

9 '-x+2/3, -y+1/3, -z+1/3'

10 '-x+y+2/3, -x+1/3, z+1/3'

11 '-y+2/3, x-y+1/3, z+1/3'

12 'x+2/3, y+1/3, z+1/3'

13 'x-y+1/3, x+2/3, -z+2/3'

14 'y+1/3, -x+y+2/3, -z+2/3'

15 '-x+1/3, -y+2/3, -z+2/3'

16 '-x+y+1/3, -x+2/3, z+2/3'

17 '-y+1/3, x-y+2/3, z+2/3'

18 'x+1/3, y+2/3, z+2/3'

loop\_

\_atom\_type\_symbol

\_atom\_type\_oxidation\_number

Mo3+ 2.5

Ag1+ 1

S2- -2

loop\_

\_atom\_site\_label

\_atom\_site\_type\_symbol

\_atom\_site\_symmetry\_multiplicity

\_atom\_site\_Wyckoff\_symbol

\_atom\_site\_fract\_x

\_atom\_site\_fract\_y

\_atom\_site\_fract\_z

\_atom\_site\_B\_iso\_or\_equiv

\_atom\_site\_occupancy  
Mo1 Mo3+ 18 f 0.159 0.175 0.393 . 1.  
Ag1 Ag1+ 3 a 0 0 0 . 1.  
S1 S2- 6 c 0 0 0.224 . 1.  
S2 S2- 18 f 0.048 0.349 0.082 . 1.  
#End of TTdata\_600661-ICSD

### **SnMo<sub>6</sub>S<sub>8</sub>**

#(C) 2024 by FIZ Karlsruhe - Leibniz Institute for Information Infrastructure. All rights reserved.

data\_644277-ICSD  
\_database\_code\_ICSD 644277  
\_audit\_creation\_date 2020-08-01  
\_chemical\_name\_common 'Tin molybdenum sulfide (1/6/8)'  
\_chemical\_formula\_structural 'Sn Mo6 S8'  
\_chemical\_formula\_sum 'Mo6 S8 Sn1'  
\_chemical\_name\_structure\_type Chevrel#Mo6PbS8  
\_exptl\_crystal\_density\_diffn 5.72  
\_citation\_title

;

Effect of chalcogen nonstoichiometry on superconductivity in Chevrel-phase tin molybdenum sulfides

;

\_publ\_section\_comment 'Cell and Type only determined'

loop\_

\_citation\_id

\_citation\_journal\_full

\_citation\_year

\_citation\_journal\_volume

\_citation\_page\_first

\_citation\_page\_last

\_citation\_journal\_id\_ASTM

primary 'Inorganic Chemistry' 1980 19 788 789 INOCAJ

loop\_

\_citation\_author\_citation\_id

\_citation\_author\_name

primary 'Delk, Frank S.'

primary 'Sienko, M.N.'

\_cell\_length\_a 9.174(1)

\_cell\_length\_b 9.174(1)

\_cell\_length\_c 11.367(3)

\_cell\_angle\_alpha 90.

\_cell\_angle\_beta 90.

\_cell\_angle\_gamma 120.

\_cell\_volume 828.5

\_cell\_formula\_units\_Z 3

\_space\_group\_name\_H-M\_alt 'R -3 H'

\_space\_group\_IT\_number 148

loop\_

\_space\_group\_symop\_id

\_space\_group\_symop\_operation\_xyz

1 'x-y, x, -z'

2 'y, -x+y, -z'

3 '-x, -y, -z'

4 '-x+y, -x, z'

5 '-y, x-y, z'

6 'x, y, z'

7 'x-y+2/3, x+1/3, -z+1/3'

8 'y+2/3, -x+y+1/3, -z+1/3'

9 '-x+2/3, -y+1/3, -z+1/3'

10 '-x+y+2/3, -x+1/3, z+1/3'

11 '-y+2/3, x-y+1/3, z+1/3'

12 'x+2/3, y+1/3, z+1/3'

13 'x-y+1/3, x+2/3, -z+2/3'

14 'y+1/3, -x+y+2/3, -z+2/3'

15 '-x+1/3, -y+2/3, -z+2/3'

16 '-x+y+1/3, -x+2/3, z+2/3'

17 '-y+1/3, x-y+2/3, z+2/3'

18 'x+1/3, y+2/3, z+2/3'

loop\_

\_atom\_type\_symbol

\_atom\_type\_oxidation\_number

Mo2+ 2.33

Sn2+ 2

S2- -2

loop\_

\_atom\_site\_label

\_atom\_site\_type\_symbol

\_atom\_site\_symmetry\_multiplicity

\_atom\_site\_Wyckoff\_symbol

\_atom\_site\_fract\_x

\_atom\_site\_fract\_y

\_atom\_site\_fract\_z

\_atom\_site\_B\_iso\_or\_equiv

\_atom\_site\_occupancy

Mo1 Mo2+ 18 f 0.825 0.84 0.401 . 1.

Sn1 Sn2+ 3 a 0 0 0 . 1.

S1 S2- 6 c 0 0 0.241 . 1.

S2 S2- 18 f 0.963 0.673 0.416 . 1.

#End of TTdata\_644277-ICSD



## CIF file used for AgMo<sub>6</sub>S<sub>8</sub> MBXAS spectra generation

```
#=====
==
```

```
# CRYSTAL DATA
```

```
#-----
```

```
data_VESTA_phase_1
```

```
_chemical_name_common      'Silver molybdenum(II/III) sulfide (1/6'
```

```
_cell_length_a             24.020399
```

```
_cell_length_b             24.020399
```

```
_cell_length_c             24.020399
```

```
_cell_angle_alpha          90.000000
```

```
_cell_angle_beta           90.000000
```

```
_cell_angle_gamma          90.000000
```

```
_cell_volume                1.000000
```

```
_space_group_name_H-M_alt   'P 1'
```

```
_space_group_IT_number      1
```

```
loop_
```

```
_space_group_symop_operation_xyz
```

```
'x, y, z'
```

```
loop_
```

```
_atom_site_label
```

```
_atom_site_occupancy
```

```
_atom_site_fract_x
```

```
_atom_site_fract_y
```

```
_atom_site_fract_z
```

```
_atom_site_adp_type
```

```
_atom_site_U_iso_or_equiv
```

\_atom\_site\_type\_symbol

|      |     |          |          |          |           |
|------|-----|----------|----------|----------|-----------|
| Mo1  | 1.0 | 0.527712 | 0.558741 | 0.277027 | Uiso ? Mo |
| Mo2  | 1.0 | 0.527713 | 0.334967 | 0.427177 | Uiso ? Mo |
| Mo3  | 1.0 | 0.333919 | 0.670627 | 0.427177 | Uiso ? Mo |
| Mo4  | 1.0 | 0.333919 | 0.446854 | 0.577327 | Uiso ? Mo |
| Mo5  | 1.0 | 0.721506 | 0.670627 | 0.427177 | Uiso ? Mo |
| Mo6  | 1.0 | 0.721506 | 0.446854 | 0.577327 | Uiso ? Mo |
| Mo7  | 1.0 | 0.527712 | 0.782514 | 0.577327 | Uiso ? Mo |
| Mo8  | 1.0 | 0.527712 | 0.558741 | 0.727477 | Uiso ? Mo |
| Mo9  | 1.0 | 0.472288 | 0.441259 | 0.373423 | Uiso ? Mo |
| Mo10 | 1.0 | 0.472288 | 0.217486 | 0.523574 | Uiso ? Mo |
| Mo11 | 1.0 | 0.278494 | 0.553146 | 0.523574 | Uiso ? Mo |
| Mo12 | 1.0 | 0.278494 | 0.329373 | 0.673724 | Uiso ? Mo |
| Mo13 | 1.0 | 0.666081 | 0.553146 | 0.523574 | Uiso ? Mo |
| Mo14 | 1.0 | 0.666081 | 0.329373 | 0.673724 | Uiso ? Mo |
| Mo15 | 1.0 | 0.472288 | 0.665033 | 0.673724 | Uiso ? Mo |
| Mo16 | 1.0 | 0.472288 | 0.441259 | 0.823874 | Uiso ? Mo |
| Mo17 | 1.0 | 0.435273 | 0.494629 | 0.277027 | Uiso ? Mo |
| Mo18 | 1.0 | 0.435273 | 0.270856 | 0.427177 | Uiso ? Mo |
| Mo19 | 1.0 | 0.241479 | 0.606516 | 0.427177 | Uiso ? Mo |
| Mo20 | 1.0 | 0.241479 | 0.382743 | 0.577327 | Uiso ? Mo |
| Mo21 | 1.0 | 0.629067 | 0.606516 | 0.427177 | Uiso ? Mo |
| Mo22 | 1.0 | 0.629067 | 0.382743 | 0.577327 | Uiso ? Mo |
| Mo23 | 1.0 | 0.435273 | 0.718403 | 0.577327 | Uiso ? Mo |
| Mo24 | 1.0 | 0.435273 | 0.494629 | 0.727477 | Uiso ? Mo |
| Mo25 | 1.0 | 0.564727 | 0.505371 | 0.373423 | Uiso ? Mo |
| Mo26 | 1.0 | 0.564727 | 0.281597 | 0.523574 | Uiso ? Mo |
| Mo27 | 1.0 | 0.370933 | 0.617257 | 0.523574 | Uiso ? Mo |
| Mo28 | 1.0 | 0.370933 | 0.393484 | 0.673724 | Uiso ? Mo |
| Mo29 | 1.0 | 0.758521 | 0.617257 | 0.523574 | Uiso ? Mo |

|      |     |          |          |          |           |
|------|-----|----------|----------|----------|-----------|
| Mo30 | 1.0 | 0.758521 | 0.393484 | 0.673724 | Uiso ? Mo |
| Mo31 | 1.0 | 0.564727 | 0.729144 | 0.673724 | Uiso ? Mo |
| Mo32 | 1.0 | 0.564727 | 0.505371 | 0.823874 | Uiso ? Mo |
| Mo33 | 1.0 | 0.537015 | 0.446630 | 0.277027 | Uiso ? Mo |
| Mo34 | 1.0 | 0.537015 | 0.222856 | 0.427177 | Uiso ? Mo |
| Mo35 | 1.0 | 0.343221 | 0.558517 | 0.427177 | Uiso ? Mo |
| Mo36 | 1.0 | 0.343221 | 0.334743 | 0.577327 | Uiso ? Mo |
| Mo37 | 1.0 | 0.730808 | 0.558517 | 0.427177 | Uiso ? Mo |
| Mo38 | 1.0 | 0.730808 | 0.334743 | 0.577327 | Uiso ? Mo |
| Mo39 | 1.0 | 0.537015 | 0.670404 | 0.577327 | Uiso ? Mo |
| Mo40 | 1.0 | 0.537015 | 0.446630 | 0.727477 | Uiso ? Mo |
| Mo41 | 1.0 | 0.462985 | 0.553370 | 0.373423 | Uiso ? Mo |
| Mo42 | 1.0 | 0.462985 | 0.329596 | 0.523574 | Uiso ? Mo |
| Mo43 | 1.0 | 0.269192 | 0.665257 | 0.523574 | Uiso ? Mo |
| Mo44 | 1.0 | 0.269192 | 0.441483 | 0.673724 | Uiso ? Mo |
| Mo45 | 1.0 | 0.656779 | 0.665257 | 0.523574 | Uiso ? Mo |
| Mo46 | 1.0 | 0.656779 | 0.441483 | 0.673724 | Uiso ? Mo |
| Mo47 | 1.0 | 0.462985 | 0.777144 | 0.673724 | Uiso ? Mo |
| Mo48 | 1.0 | 0.462985 | 0.553370 | 0.823874 | Uiso ? Mo |
| Ag1  | 1.0 | 0.500000 | 0.500000 | 0.100000 | Uiso ? Ag |
| Ag2  | 1.0 | 0.500000 | 0.276226 | 0.250150 | Uiso ? Ag |
| Ag3  | 1.0 | 0.306206 | 0.611887 | 0.250150 | Uiso ? Ag |
| Ag4  | 1.0 | 0.306206 | 0.388113 | 0.400300 | Uiso ? Ag |
| Ag5  | 1.0 | 0.693794 | 0.611887 | 0.250150 | Uiso ? Ag |
| Ag6  | 1.0 | 0.693794 | 0.388113 | 0.400300 | Uiso ? Ag |
| Ag7  | 1.0 | 0.500000 | 0.723774 | 0.400300 | Uiso ? Ag |
| Ag8  | 1.0 | 0.500000 | 0.500000 | 0.550450 | Uiso ? Ag |
| S1   | 1.0 | 0.500000 | 0.500000 | 0.200901 | Uiso ? S  |
| S2   | 1.0 | 0.500000 | 0.276226 | 0.351051 | Uiso ? S  |
| S3   | 1.0 | 0.306206 | 0.611887 | 0.351051 | Uiso ? S  |

|     |     |          |          |          |          |
|-----|-----|----------|----------|----------|----------|
| S4  | 1.0 | 0.306206 | 0.388113 | 0.501201 | Uiso ? S |
| S5  | 1.0 | 0.693794 | 0.611887 | 0.351051 | Uiso ? S |
| S6  | 1.0 | 0.693794 | 0.388113 | 0.501201 | Uiso ? S |
| S7  | 1.0 | 0.500000 | 0.723774 | 0.501201 | Uiso ? S |
| S8  | 1.0 | 0.500000 | 0.500000 | 0.651351 | Uiso ? S |
| S9  | 1.0 | 0.500000 | 0.500000 | 0.449550 | Uiso ? S |
| S10 | 1.0 | 0.500000 | 0.276226 | 0.599700 | Uiso ? S |
| S11 | 1.0 | 0.306206 | 0.611887 | 0.599700 | Uiso ? S |
| S12 | 1.0 | 0.306206 | 0.388113 | 0.749850 | Uiso ? S |
| S13 | 1.0 | 0.693794 | 0.611887 | 0.599700 | Uiso ? S |
| S14 | 1.0 | 0.693794 | 0.388113 | 0.749850 | Uiso ? S |
| S15 | 1.0 | 0.500000 | 0.723774 | 0.749850 | Uiso ? S |
| S16 | 1.0 | 0.500000 | 0.500000 | 0.900000 | Uiso ? S |
| S17 | 1.0 | 0.450970 | 0.393372 | 0.287087 | Uiso ? S |
| S18 | 1.0 | 0.450970 | 0.169598 | 0.437237 | Uiso ? S |
| S19 | 1.0 | 0.257177 | 0.505259 | 0.437237 | Uiso ? S |
| S20 | 1.0 | 0.257177 | 0.281485 | 0.587387 | Uiso ? S |
| S21 | 1.0 | 0.644764 | 0.505259 | 0.437237 | Uiso ? S |
| S22 | 1.0 | 0.644764 | 0.281485 | 0.587387 | Uiso ? S |
| S23 | 1.0 | 0.450970 | 0.617145 | 0.587387 | Uiso ? S |
| S24 | 1.0 | 0.450970 | 0.393372 | 0.737538 | Uiso ? S |
| S25 | 1.0 | 0.549030 | 0.606628 | 0.363363 | Uiso ? S |
| S26 | 1.0 | 0.549030 | 0.382855 | 0.513514 | Uiso ? S |
| S27 | 1.0 | 0.355236 | 0.718515 | 0.513514 | Uiso ? S |
| S28 | 1.0 | 0.355236 | 0.494741 | 0.663664 | Uiso ? S |
| S29 | 1.0 | 0.742823 | 0.718515 | 0.513514 | Uiso ? S |
| S30 | 1.0 | 0.742823 | 0.494741 | 0.663664 | Uiso ? S |
| S31 | 1.0 | 0.549030 | 0.830402 | 0.663664 | Uiso ? S |
| S32 | 1.0 | 0.549030 | 0.606628 | 0.813814 | Uiso ? S |
| S33 | 1.0 | 0.616858 | 0.510853 | 0.287087 | Uiso ? S |

|     |     |          |          |          |          |
|-----|-----|----------|----------|----------|----------|
| S34 | 1.0 | 0.616858 | 0.287079 | 0.437237 | Uiso ? S |
| S35 | 1.0 | 0.423064 | 0.622740 | 0.437237 | Uiso ? S |
| S36 | 1.0 | 0.423064 | 0.398966 | 0.587387 | Uiso ? S |
| S37 | 1.0 | 0.810651 | 0.622740 | 0.437237 | Uiso ? S |
| S38 | 1.0 | 0.810651 | 0.398966 | 0.587387 | Uiso ? S |
| S39 | 1.0 | 0.616858 | 0.734627 | 0.587387 | Uiso ? S |
| S40 | 1.0 | 0.616858 | 0.510853 | 0.737538 | Uiso ? S |
| S41 | 1.0 | 0.383142 | 0.489147 | 0.363363 | Uiso ? S |
| S42 | 1.0 | 0.383142 | 0.265373 | 0.513514 | Uiso ? S |
| S43 | 1.0 | 0.189349 | 0.601034 | 0.513514 | Uiso ? S |
| S44 | 1.0 | 0.189349 | 0.377260 | 0.663664 | Uiso ? S |
| S45 | 1.0 | 0.576936 | 0.601034 | 0.513514 | Uiso ? S |
| S46 | 1.0 | 0.576936 | 0.377260 | 0.663664 | Uiso ? S |
| S47 | 1.0 | 0.383142 | 0.712921 | 0.663664 | Uiso ? S |
| S48 | 1.0 | 0.383142 | 0.489147 | 0.813814 | Uiso ? S |
| S49 | 1.0 | 0.432172 | 0.595775 | 0.287087 | Uiso ? S |
| S50 | 1.0 | 0.432172 | 0.372002 | 0.437237 | Uiso ? S |
| S51 | 1.0 | 0.238379 | 0.707662 | 0.437237 | Uiso ? S |
| S52 | 1.0 | 0.238379 | 0.483888 | 0.587387 | Uiso ? S |
| S53 | 1.0 | 0.625966 | 0.707662 | 0.437237 | Uiso ? S |
| S54 | 1.0 | 0.625966 | 0.483888 | 0.587387 | Uiso ? S |
| S55 | 1.0 | 0.432172 | 0.819549 | 0.587387 | Uiso ? S |
| S56 | 1.0 | 0.432172 | 0.595775 | 0.737538 | Uiso ? S |
| S57 | 1.0 | 0.567828 | 0.404225 | 0.363363 | Uiso ? S |
| S58 | 1.0 | 0.567828 | 0.180451 | 0.513514 | Uiso ? S |
| S59 | 1.0 | 0.374034 | 0.516112 | 0.513514 | Uiso ? S |
| S60 | 1.0 | 0.374034 | 0.292338 | 0.663664 | Uiso ? S |
| S61 | 1.0 | 0.761621 | 0.516112 | 0.513514 | Uiso ? S |
| S62 | 1.0 | 0.761621 | 0.292338 | 0.663664 | Uiso ? S |
| S63 | 1.0 | 0.567828 | 0.627998 | 0.663664 | Uiso ? S |

S64 1.0 0.567828 0.404225 0.813814 Uiso ? S

### Charge cube CIF for AgMo<sub>6</sub>S<sub>8</sub> used for isosurface visualization

```
#=====
==
```

# CRYSTAL DATA

```
#-----
```

data\_VESTA\_phase\_1

\_chemical\_name\_common ' Cubefile created from PWScf calculati'

\_cell\_length\_a 12.946022

\_cell\_length\_b 12.946022

\_cell\_length\_c 12.946083

\_cell\_angle\_alpha 91.966988

\_cell\_angle\_beta 91.966988

\_cell\_angle\_gamma 91.966812

\_cell\_volume 2165.831489

\_space\_group\_name\_H-M\_alt 'P 1'

\_space\_group\_IT\_number 1

loop\_

\_space\_group\_symop\_operation\_xyz

'x, y, z'

loop\_

\_atom\_site\_label

\_atom\_site\_occupancy

\_atom\_site\_fract\_x

\_atom\_site\_fract\_y

\_atom\_site\_fract\_z  
\_atom\_site\_adp\_type  
\_atom\_site\_U\_iso\_or\_equiv  
\_atom\_site\_type\_symbol

#=====  
==

# CRYSTAL DATA

#-----

data\_VESTA\_phase\_2

\_chemical\_name\_common            ' Cubefile created from PWScf calculati'  
\_cell\_length\_a                    1.000000  
\_cell\_length\_b                    1.000000  
\_cell\_length\_c                    1.000000  
\_cell\_angle\_alpha                 90.000000  
\_cell\_angle\_beta                  90.000000  
\_cell\_angle\_gamma                90.000000  
\_cell\_volume                      1.000000  
\_space\_group\_name\_H-M\_alt        'P 1'  
\_space\_group\_IT\_number            1

loop\_

\_space\_group\_symop\_operation\_xyz  
'x, y, z'

loop\_

\_atom\_site\_label  
\_atom\_site\_occupancy  
\_atom\_site\_fract\_x

\_atom\_site\_fract\_y

\_atom\_site\_fract\_z

\_atom\_site\_adp\_type

\_atom\_site\_U\_iso\_or\_equiv

\_atom\_site\_type\_symbol

|      |     |           |           |           |      |      |
|------|-----|-----------|-----------|-----------|------|------|
| Mo1  | 1.0 | 0.665665  | 1.321386  | 4.492704  | Uiso | ? Mo |
| Mo2  | 1.0 | 0.665665  | -4.053745 | 8.099370  | Uiso | ? Mo |
| Mo3  | 1.0 | -3.989336 | 4.008951  | 8.099370  | Uiso | ? Mo |
| Mo4  | 1.0 | -3.989335 | -1.366180 | 11.706037 | Uiso | ? Mo |
| Mo5  | 1.0 | 5.320664  | 4.008951  | 8.099370  | Uiso | ? Mo |
| Mo6  | 1.0 | 5.320665  | -1.366180 | 11.706037 | Uiso | ? Mo |
| Mo7  | 1.0 | 0.665664  | 6.696516  | 11.706037 | Uiso | ? Mo |
| Mo8  | 1.0 | 0.665665  | 1.321386  | 15.312703 | Uiso | ? Mo |
| Mo9  | 1.0 | -0.665665 | -1.500558 | 6.808184  | Uiso | ? Mo |
| Mo10 | 1.0 | -0.665664 | -6.875689 | 10.414850 | Uiso | ? Mo |
| Mo11 | 1.0 | -5.320665 | 1.187007  | 10.414850 | Uiso | ? Mo |
| Mo12 | 1.0 | -5.320664 | -4.188123 | 14.021517 | Uiso | ? Mo |
| Mo13 | 1.0 | 3.989335  | 1.187007  | 10.414850 | Uiso | ? Mo |
| Mo14 | 1.0 | 3.989336  | -4.188123 | 14.021517 | Uiso | ? Mo |
| Mo15 | 1.0 | -0.665665 | 3.874572  | 14.021517 | Uiso | ? Mo |
| Mo16 | 1.0 | -0.665665 | -1.500558 | 17.628183 | Uiso | ? Mo |
| Mo17 | 1.0 | -1.554770 | -0.218589 | 4.492704  | Uiso | ? Mo |
| Mo18 | 1.0 | -1.554769 | -5.593719 | 8.099370  | Uiso | ? Mo |
| Mo19 | 1.0 | -6.209770 | 2.468976  | 8.099370  | Uiso | ? Mo |
| Mo20 | 1.0 | -6.209769 | -2.906155 | 11.706037 | Uiso | ? Mo |
| Mo21 | 1.0 | 3.100230  | 2.468976  | 8.099370  | Uiso | ? Mo |
| Mo22 | 1.0 | 3.100230  | -2.906155 | 11.706037 | Uiso | ? Mo |
| Mo23 | 1.0 | -1.554771 | 5.156541  | 11.706037 | Uiso | ? Mo |
| Mo24 | 1.0 | -1.554770 | -0.218589 | 15.312703 | Uiso | ? Mo |
| Mo25 | 1.0 | 1.554770  | 0.039417  | 6.808184  | Uiso | ? Mo |



|      |     |           |           |           |           |
|------|-----|-----------|-----------|-----------|-----------|
| Mo26 | 1.0 | 1.554771  | -5.335713 | 10.414850 | Uiso ? Mo |
| Mo27 | 1.0 | -3.100230 | 2.726982  | 10.414850 | Uiso ? Mo |
| Mo28 | 1.0 | -3.100230 | -2.648148 | 14.021517 | Uiso ? Mo |
| Mo29 | 1.0 | 6.209769  | 2.726982  | 10.414850 | Uiso ? Mo |
| Mo30 | 1.0 | 6.209770  | -2.648148 | 14.021517 | Uiso ? Mo |
| Mo31 | 1.0 | 1.554769  | 5.414548  | 14.021517 | Uiso ? Mo |
| Mo32 | 1.0 | 1.554770  | 0.039417  | 17.628183 | Uiso ? Mo |
| Mo33 | 1.0 | 0.889105  | -1.371555 | 4.492704  | Uiso ? Mo |
| Mo34 | 1.0 | 0.889105  | -6.746685 | 8.099370  | Uiso ? Mo |
| Mo35 | 1.0 | -3.765895 | 1.316011  | 8.099370  | Uiso ? Mo |
| Mo36 | 1.0 | -3.765895 | -4.059120 | 11.706037 | Uiso ? Mo |
| Mo37 | 1.0 | 5.544105  | 1.316011  | 8.099370  | Uiso ? Mo |
| Mo38 | 1.0 | 5.544105  | -4.059120 | 11.706037 | Uiso ? Mo |
| Mo39 | 1.0 | 0.889104  | 4.003576  | 11.706037 | Uiso ? Mo |
| Mo40 | 1.0 | 0.889105  | -1.371555 | 15.312703 | Uiso ? Mo |
| Mo41 | 1.0 | -0.889105 | 1.192382  | 6.808184  | Uiso ? Mo |
| Mo42 | 1.0 | -0.889104 | -4.182748 | 10.414850 | Uiso ? Mo |
| Mo43 | 1.0 | -5.544105 | 3.879948  | 10.414850 | Uiso ? Mo |
| Mo44 | 1.0 | -5.544105 | -1.495183 | 14.021517 | Uiso ? Mo |
| Mo45 | 1.0 | 3.765895  | 3.879948  | 10.414850 | Uiso ? Mo |
| Mo46 | 1.0 | 3.765895  | -1.495183 | 14.021517 | Uiso ? Mo |
| Mo47 | 1.0 | -0.889105 | 6.567513  | 14.021517 | Uiso ? Mo |
| Mo48 | 1.0 | -0.889105 | 1.192383  | 17.628183 | Uiso ? Mo |
| Ag1  | 1.0 | 0.000000  | -0.089586 | 0.240444  | Uiso ? Ag |
| Ag2  | 1.0 | 0.000001  | -5.464717 | 3.847111  | Uiso ? Ag |
| Ag3  | 1.0 | -4.655000 | 2.597979  | 3.847111  | Uiso ? Ag |
| Ag4  | 1.0 | -4.655000 | -2.777152 | 7.453777  | Uiso ? Ag |
| Ag5  | 1.0 | 4.655000  | 2.597979  | 3.847111  | Uiso ? Ag |
| Ag6  | 1.0 | 4.655000  | -2.777152 | 7.453777  | Uiso ? Ag |
| Ag7  | 1.0 | -0.000001 | 5.285544  | 7.453777  | Uiso ? Ag |

|     |     |           |           |           |           |
|-----|-----|-----------|-----------|-----------|-----------|
| Ag8 | 1.0 | -0.000000 | -0.089586 | 11.060444 | Uiso ? Ag |
| S1  | 1.0 | 0.000000  | -0.089586 | 2.664124  | Uiso ? S  |
| S2  | 1.0 | 0.000001  | -5.464717 | 6.270791  | Uiso ? S  |
| S3  | 1.0 | -4.655000 | 2.597979  | 6.270791  | Uiso ? S  |
| S4  | 1.0 | -4.655000 | -2.777152 | 9.877457  | Uiso ? S  |
| S5  | 1.0 | 4.655000  | 2.597979  | 6.270791  | Uiso ? S  |
| S6  | 1.0 | 4.655000  | -2.777152 | 9.877457  | Uiso ? S  |
| S7  | 1.0 | -0.000001 | 5.285544  | 9.877457  | Uiso ? S  |
| S8  | 1.0 | -0.000000 | -0.089586 | 13.484124 | Uiso ? S  |
| S9  | 1.0 | -0.000000 | -0.089586 | 8.636764  | Uiso ? S  |
| S10 | 1.0 | 0.000001  | -5.464717 | 12.243431 | Uiso ? S  |
| S11 | 1.0 | -4.655000 | 2.597979  | 12.243431 | Uiso ? S  |
| S12 | 1.0 | -4.655000 | -2.777152 | 15.850098 | Uiso ? S  |
| S13 | 1.0 | 4.655000  | 2.597979  | 12.243431 | Uiso ? S  |
| S14 | 1.0 | 4.655000  | -2.777152 | 15.850098 | Uiso ? S  |
| S15 | 1.0 | -0.000001 | 5.285544  | 15.850098 | Uiso ? S  |
| S16 | 1.0 | -0.000000 | -0.089586 | 19.456764 | Uiso ? S  |
| S17 | 1.0 | -1.177715 | -2.650836 | 4.734351  | Uiso ? S  |
| S18 | 1.0 | -1.177714 | -8.025967 | 8.341018  | Uiso ? S  |
| S19 | 1.0 | -5.832716 | 0.036730  | 8.341018  | Uiso ? S  |
| S20 | 1.0 | -5.832714 | -5.338401 | 11.947683 | Uiso ? S  |
| S21 | 1.0 | 3.477285  | 0.036730  | 8.341018  | Uiso ? S  |
| S22 | 1.0 | 3.477285  | -5.338401 | 11.947683 | Uiso ? S  |
| S23 | 1.0 | -1.177716 | 2.724295  | 11.947683 | Uiso ? S  |
| S24 | 1.0 | -1.177715 | -2.650836 | 15.554350 | Uiso ? S  |
| S25 | 1.0 | 1.177715  | 2.471663  | 6.566538  | Uiso ? S  |
| S26 | 1.0 | 1.177716  | -2.903467 | 10.173203 | Uiso ? S  |
| S27 | 1.0 | -3.477286 | 5.159229  | 10.173203 | Uiso ? S  |
| S28 | 1.0 | -3.477285 | -0.215902 | 13.779870 | Uiso ? S  |
| S29 | 1.0 | 5.832714  | 5.159229  | 10.173203 | Uiso ? S  |

|     |     |           |           |           |          |
|-----|-----|-----------|-----------|-----------|----------|
| S30 | 1.0 | 5.832715  | -0.215902 | 13.779870 | Uiso ? S |
| S31 | 1.0 | 1.177714  | 7.846794  | 13.779870 | Uiso ? S |
| S32 | 1.0 | 1.177715  | 2.471663  | 17.386536 | Uiso ? S |
| S33 | 1.0 | 2.806965  | 0.171107  | 4.734351  | Uiso ? S |
| S34 | 1.0 | 2.806965  | -5.204023 | 8.341018  | Uiso ? S |
| S35 | 1.0 | -1.848035 | 2.858673  | 8.341018  | Uiso ? S |
| S36 | 1.0 | -1.848035 | -2.516458 | 11.947683 | Uiso ? S |
| S37 | 1.0 | 7.461965  | 2.858673  | 8.341018  | Uiso ? S |
| S38 | 1.0 | 7.461965  | -2.516458 | 11.947683 | Uiso ? S |
| S39 | 1.0 | 2.806964  | 5.546238  | 11.947683 | Uiso ? S |
| S40 | 1.0 | 2.806965  | 0.171107  | 15.554350 | Uiso ? S |
| S41 | 1.0 | -2.806965 | -0.350280 | 6.566538  | Uiso ? S |
| S42 | 1.0 | -2.806964 | -5.725410 | 10.173203 | Uiso ? S |
| S43 | 1.0 | -7.461965 | 2.337286  | 10.173203 | Uiso ? S |
| S44 | 1.0 | -7.461965 | -3.037845 | 13.779870 | Uiso ? S |
| S45 | 1.0 | 1.848035  | 2.337286  | 10.173203 | Uiso ? S |
| S46 | 1.0 | 1.848035  | -3.037845 | 13.779870 | Uiso ? S |
| S47 | 1.0 | -2.806965 | 5.024851  | 13.779870 | Uiso ? S |
| S48 | 1.0 | -2.806965 | -0.350280 | 17.386536 | Uiso ? S |
| S49 | 1.0 | -1.629250 | 2.210970  | 4.734351  | Uiso ? S |
| S50 | 1.0 | -1.629249 | -3.164161 | 8.341018  | Uiso ? S |
| S51 | 1.0 | -6.284251 | 4.898535  | 8.341018  | Uiso ? S |
| S52 | 1.0 | -6.284250 | -0.476595 | 11.947683 | Uiso ? S |
| S53 | 1.0 | 3.025749  | 4.898535  | 8.341018  | Uiso ? S |
| S54 | 1.0 | 3.025750  | -0.476595 | 11.947683 | Uiso ? S |
| S55 | 1.0 | -1.629251 | 7.586101  | 11.947683 | Uiso ? S |
| S56 | 1.0 | -1.629250 | 2.210970  | 15.554350 | Uiso ? S |
| S57 | 1.0 | 1.629250  | -2.390142 | 6.566538  | Uiso ? S |
| S58 | 1.0 | 1.629251  | -7.765273 | 10.173203 | Uiso ? S |
| S59 | 1.0 | -3.025751 | 0.297423  | 10.173203 | Uiso ? S |

|     |     |           |           |           |          |
|-----|-----|-----------|-----------|-----------|----------|
| S60 | 1.0 | -3.025749 | -5.077708 | 13.779870 | Uiso ? S |
| S61 | 1.0 | 6.284250  | 0.297423  | 10.173203 | Uiso ? S |
| S62 | 1.0 | 6.284251  | -5.077708 | 13.779870 | Uiso ? S |
| S63 | 1.0 | 1.629249  | 2.984988  | 13.779870 | Uiso ? S |
| S64 | 1.0 | 1.629250  | -2.390142 | 17.386536 | Uiso ? S |

### CIF file used for SnMo<sub>6</sub>S<sub>8</sub> MBXAS spectra generation

```

#-----
==
# CRYSTAL DATA
#-----
data_VESTA_phase_1

_chemical_name_common      'Mo6 S8 Sn 2 x 2 x 2 supercell'
_cell_length_a             15.393229
_cell_length_b             15.393229
_cell_length_c             15.393229
_cell_angle_alpha          90.000000
_cell_angle_beta           90.000000
_cell_angle_gamma          90.000000
_cell_volume               1.000000
_space_group_name_H-M_alt   'P 1'
_space_group_IT_number      1

loop_
_space_group_symop_operation_xyz
  'x, y, z'
```

loop\_

\_atom\_site\_label

\_atom\_site\_occupancy

\_atom\_site\_fract\_x

\_atom\_site\_fract\_y

\_atom\_site\_fract\_z

\_atom\_site\_adp\_type

\_atom\_site\_U\_iso\_or\_equiv

\_atom\_site\_type\_symbol

|      |     |          |          |          |      |      |
|------|-----|----------|----------|----------|------|------|
| Mo1  | 1.0 | 0.198027 | 0.340321 | 0.279990 | Uiso | ? Mo |
| Mo2  | 1.0 | 0.200982 | 0.343255 | 0.703208 | Uiso | ? Mo |
| Mo3  | 1.0 | 0.200982 | 0.763549 | 0.279990 | Uiso | ? Mo |
| Mo4  | 1.0 | 0.203936 | 0.766483 | 0.703208 | Uiso | ? Mo |
| Mo5  | 1.0 | 0.621265 | 0.340321 | 0.279990 | Uiso | ? Mo |
| Mo6  | 1.0 | 0.624220 | 0.343255 | 0.703208 | Uiso | ? Mo |
| Mo7  | 1.0 | 0.624220 | 0.763549 | 0.279990 | Uiso | ? Mo |
| Mo8  | 1.0 | 0.627174 | 0.766483 | 0.703208 | Uiso | ? Mo |
| Mo9  | 1.0 | 0.431121 | 0.289608 | 0.351768 | Uiso | ? Mo |
| Mo10 | 1.0 | 0.434075 | 0.292542 | 0.774986 | Uiso | ? Mo |
| Mo11 | 1.0 | 0.434075 | 0.712836 | 0.351768 | Uiso | ? Mo |
| Mo12 | 1.0 | 0.437030 | 0.715770 | 0.774986 | Uiso | ? Mo |
| Mo13 | 1.0 | 0.854359 | 0.289608 | 0.351768 | Uiso | ? Mo |
| Mo14 | 1.0 | 0.857313 | 0.292542 | 0.774986 | Uiso | ? Mo |
| Mo15 | 1.0 | 0.857313 | 0.712836 | 0.351768 | Uiso | ? Mo |
| Mo16 | 1.0 | 0.860268 | 0.715770 | 0.774986 | Uiso | ? Mo |
| Mo17 | 1.0 | 0.278049 | 0.198670 | 0.341484 | Uiso | ? Mo |
| Mo18 | 1.0 | 0.281004 | 0.201604 | 0.764701 | Uiso | ? Mo |
| Mo19 | 1.0 | 0.281004 | 0.621897 | 0.341484 | Uiso | ? Mo |
| Mo20 | 1.0 | 0.283958 | 0.624832 | 0.764701 | Uiso | ? Mo |
| Mo21 | 1.0 | 0.701287 | 0.198670 | 0.341484 | Uiso | ? Mo |

|      |     |          |          |          |           |
|------|-----|----------|----------|----------|-----------|
| Mo22 | 1.0 | 0.704242 | 0.201604 | 0.764701 | Uiso ? Mo |
| Mo23 | 1.0 | 0.704242 | 0.621897 | 0.341484 | Uiso ? Mo |
| Mo24 | 1.0 | 0.707196 | 0.624832 | 0.764701 | Uiso ? Mo |
| Mo25 | 1.0 | 0.351099 | 0.431259 | 0.290275 | Uiso ? Mo |
| Mo26 | 1.0 | 0.354053 | 0.434193 | 0.713492 | Uiso ? Mo |
| Mo27 | 1.0 | 0.354053 | 0.854487 | 0.290275 | Uiso ? Mo |
| Mo28 | 1.0 | 0.357008 | 0.857421 | 0.713492 | Uiso ? Mo |
| Mo29 | 1.0 | 0.774337 | 0.431259 | 0.290275 | Uiso ? Mo |
| Mo30 | 1.0 | 0.777291 | 0.434193 | 0.713492 | Uiso ? Mo |
| Mo31 | 1.0 | 0.777291 | 0.854487 | 0.290275 | Uiso ? Mo |
| Mo32 | 1.0 | 0.780246 | 0.857421 | 0.713492 | Uiso ? Mo |
| Mo33 | 1.0 | 0.339116 | 0.278267 | 0.199410 | Uiso ? Mo |
| Mo34 | 1.0 | 0.342071 | 0.281201 | 0.622627 | Uiso ? Mo |
| Mo35 | 1.0 | 0.342071 | 0.701495 | 0.199410 | Uiso ? Mo |
| Mo36 | 1.0 | 0.345025 | 0.704429 | 0.622627 | Uiso ? Mo |
| Mo37 | 1.0 | 0.762354 | 0.278267 | 0.199410 | Uiso ? Mo |
| Mo38 | 1.0 | 0.765309 | 0.281201 | 0.622627 | Uiso ? Mo |
| Mo39 | 1.0 | 0.765309 | 0.701495 | 0.199410 | Uiso ? Mo |
| Mo40 | 1.0 | 0.768263 | 0.704429 | 0.622627 | Uiso ? Mo |
| Mo41 | 1.0 | 0.290032 | 0.351662 | 0.432349 | Uiso ? Mo |
| Mo42 | 1.0 | 0.292986 | 0.354596 | 0.855566 | Uiso ? Mo |
| Mo43 | 1.0 | 0.292986 | 0.774889 | 0.432349 | Uiso ? Mo |
| Mo44 | 1.0 | 0.295941 | 0.777824 | 0.855566 | Uiso ? Mo |
| Mo45 | 1.0 | 0.713270 | 0.351662 | 0.432349 | Uiso ? Mo |
| Mo46 | 1.0 | 0.716224 | 0.354596 | 0.855566 | Uiso ? Mo |
| Mo47 | 1.0 | 0.716224 | 0.774889 | 0.432349 | Uiso ? Mo |
| Mo48 | 1.0 | 0.719179 | 0.777824 | 0.855566 | Uiso ? Mo |
| S1   | 1.0 | 0.415929 | 0.157974 | 0.264881 | Uiso ? S  |
| S2   | 1.0 | 0.418883 | 0.160908 | 0.688099 | Uiso ? S  |
| S3   | 1.0 | 0.418883 | 0.581202 | 0.264881 | Uiso ? S  |

|     |     |          |          |          |          |
|-----|-----|----------|----------|----------|----------|
| S4  | 1.0 | 0.421838 | 0.584136 | 0.688099 | Uiso ? S |
| S5  | 1.0 | 0.839167 | 0.157974 | 0.264881 | Uiso ? S |
| S6  | 1.0 | 0.842121 | 0.160908 | 0.688099 | Uiso ? S |
| S7  | 1.0 | 0.842121 | 0.581202 | 0.264881 | Uiso ? S |
| S8  | 1.0 | 0.845076 | 0.584136 | 0.688099 | Uiso ? S |
| S9  | 1.0 | 0.213219 | 0.471955 | 0.366877 | Uiso ? S |
| S10 | 1.0 | 0.216174 | 0.474889 | 0.790094 | Uiso ? S |
| S11 | 1.0 | 0.216174 | 0.895182 | 0.366877 | Uiso ? S |
| S12 | 1.0 | 0.219128 | 0.898116 | 0.790094 | Uiso ? S |
| S13 | 1.0 | 0.636457 | 0.471955 | 0.366877 | Uiso ? S |
| S14 | 1.0 | 0.639412 | 0.474889 | 0.790094 | Uiso ? S |
| S15 | 1.0 | 0.639412 | 0.895182 | 0.366877 | Uiso ? S |
| S16 | 1.0 | 0.642366 | 0.898116 | 0.790094 | Uiso ? S |
| S17 | 1.0 | 0.263198 | 0.416681 | 0.159246 | Uiso ? S |
| S18 | 1.0 | 0.266152 | 0.419615 | 0.582464 | Uiso ? S |
| S19 | 1.0 | 0.266152 | 0.839908 | 0.159246 | Uiso ? S |
| S20 | 1.0 | 0.269107 | 0.842842 | 0.582464 | Uiso ? S |
| S21 | 1.0 | 0.686436 | 0.416681 | 0.159246 | Uiso ? S |
| S22 | 1.0 | 0.689390 | 0.419615 | 0.582464 | Uiso ? S |
| S23 | 1.0 | 0.689390 | 0.839908 | 0.159246 | Uiso ? S |
| S24 | 1.0 | 0.692345 | 0.842842 | 0.582464 | Uiso ? S |
| S25 | 1.0 | 0.365950 | 0.213248 | 0.472512 | Uiso ? S |
| S26 | 1.0 | 0.368905 | 0.216183 | 0.895730 | Uiso ? S |
| S27 | 1.0 | 0.368905 | 0.636476 | 0.472512 | Uiso ? S |
| S28 | 1.0 | 0.371859 | 0.639410 | 0.895730 | Uiso ? S |
| S29 | 1.0 | 0.789188 | 0.213248 | 0.472512 | Uiso ? S |
| S30 | 1.0 | 0.792143 | 0.216183 | 0.895730 | Uiso ? S |
| S31 | 1.0 | 0.792143 | 0.636476 | 0.472512 | Uiso ? S |
| S32 | 1.0 | 0.795097 | 0.639410 | 0.895730 | Uiso ? S |
| S33 | 1.0 | 0.158295 | 0.264678 | 0.418679 | Uiso ? S |

|     |     |          |          |          |          |
|-----|-----|----------|----------|----------|----------|
| S34 | 1.0 | 0.161250 | 0.267612 | 0.841896 | Uiso ? S |
| S35 | 1.0 | 0.161250 | 0.687906 | 0.418679 | Uiso ? S |
| S36 | 1.0 | 0.164205 | 0.690840 | 0.841896 | Uiso ? S |
| S37 | 1.0 | 0.581533 | 0.264678 | 0.418679 | Uiso ? S |
| S38 | 1.0 | 0.584488 | 0.267612 | 0.841896 | Uiso ? S |
| S39 | 1.0 | 0.584488 | 0.687906 | 0.418679 | Uiso ? S |
| S40 | 1.0 | 0.587443 | 0.690840 | 0.841896 | Uiso ? S |
| S41 | 1.0 | 0.470852 | 0.365251 | 0.213080 | Uiso ? S |
| S42 | 1.0 | 0.473807 | 0.368185 | 0.636297 | Uiso ? S |
| S43 | 1.0 | 0.473807 | 0.788478 | 0.213080 | Uiso ? S |
| S44 | 1.0 | 0.476762 | 0.791413 | 0.636297 | Uiso ? S |
| S45 | 1.0 | 0.894091 | 0.365251 | 0.213080 | Uiso ? S |
| S46 | 1.0 | 0.897045 | 0.368185 | 0.636297 | Uiso ? S |
| S47 | 1.0 | 0.897045 | 0.788478 | 0.213080 | Uiso ? S |
| S48 | 1.0 | 0.900000 | 0.791413 | 0.636297 | Uiso ? S |
| S49 | 1.0 | 0.204025 | 0.205185 | 0.206858 | Uiso ? S |
| S50 | 1.0 | 0.206980 | 0.208119 | 0.630076 | Uiso ? S |
| S51 | 1.0 | 0.206980 | 0.628413 | 0.206858 | Uiso ? S |
| S52 | 1.0 | 0.209935 | 0.631347 | 0.630076 | Uiso ? S |
| S53 | 1.0 | 0.627263 | 0.205185 | 0.206858 | Uiso ? S |
| S54 | 1.0 | 0.630218 | 0.208119 | 0.630076 | Uiso ? S |
| S55 | 1.0 | 0.630218 | 0.628413 | 0.206858 | Uiso ? S |
| S56 | 1.0 | 0.633173 | 0.631347 | 0.630076 | Uiso ? S |
| S57 | 1.0 | 0.425122 | 0.424744 | 0.424900 | Uiso ? S |
| S58 | 1.0 | 0.428077 | 0.427678 | 0.848118 | Uiso ? S |
| S59 | 1.0 | 0.428077 | 0.847971 | 0.424900 | Uiso ? S |
| S60 | 1.0 | 0.431032 | 0.850906 | 0.848118 | Uiso ? S |
| S61 | 1.0 | 0.848360 | 0.424744 | 0.424900 | Uiso ? S |
| S62 | 1.0 | 0.851315 | 0.427678 | 0.848118 | Uiso ? S |
| S63 | 1.0 | 0.851315 | 0.847971 | 0.424900 | Uiso ? S |



|      |     |          |          |          |           |
|------|-----|----------|----------|----------|-----------|
| S64  | 1.0 | 0.854270 | 0.850906 | 0.848118 | Uiso ? S  |
| Sn65 | 1.0 | 0.100000 | 0.101884 | 0.104270 | Uiso ? Sn |
| Sn66 | 1.0 | 0.102955 | 0.104818 | 0.527488 | Uiso ? Sn |
| Sn67 | 1.0 | 0.102955 | 0.525111 | 0.104270 | Uiso ? Sn |
| Sn68 | 1.0 | 0.105909 | 0.528045 | 0.527488 | Uiso ? Sn |
| Sn69 | 1.0 | 0.523238 | 0.101884 | 0.104270 | Uiso ? Sn |
| Sn70 | 1.0 | 0.526193 | 0.104818 | 0.527488 | Uiso ? Sn |
| Sn71 | 1.0 | 0.526193 | 0.525111 | 0.104270 | Uiso ? Sn |
| Sn72 | 1.0 | 0.529148 | 0.528045 | 0.527488 | Uiso ? Sn |

### Charge cube CIF for SnMo<sub>6</sub>S<sub>8</sub> used for isosurface visualization

```
#=====
==
```

```
# CRYSTAL DATA
```

```
#-----
```

```
data_VESTA_phase_1
```

```

_chemical_name_common          ' Cubefile created from PWScf calculati'
_cell_length_a                  13.030015
_cell_length_b                  13.030015
_cell_length_c                  13.030011
_cell_angle_alpha               89.599869
_cell_angle_beta                89.599861
_cell_angle_gamma               89.599861
_cell_volume                    2212.091022
_space_group_name_H-M_alt       'P 1'
_space_group_IT_number          1

```

```
loop_
```

```
_space_group_symop_operation_xyz
```

'x, y, z'

loop\_

\_atom\_site\_label  
\_atom\_site\_occupancy  
\_atom\_site\_fract\_x  
\_atom\_site\_fract\_y  
\_atom\_site\_fract\_z  
\_atom\_site\_adp\_type  
\_atom\_site\_U\_iso\_or\_equiv  
\_atom\_site\_type\_symbol

#=====

# CRYSTAL DATA

#-----

data\_VESTA\_phase\_2

\_chemical\_name\_common            ' Cubefile created from PWSef calculati'  
\_cell\_length\_a                    1.000000  
\_cell\_length\_b                    1.000000  
\_cell\_length\_c                    1.000000  
\_cell\_angle\_alpha                 90.000000  
\_cell\_angle\_beta                  90.000000  
\_cell\_angle\_gamma                 90.000000  
\_cell\_volume                      1.000000  
\_space\_group\_name\_H-M\_alt         'P 1'  
\_space\_group\_IT\_number            1

loop\_

\_space\_group\_symop\_operation\_xyz

'x, y, z'

loop\_

\_atom\_site\_label

\_atom\_site\_occupancy

\_atom\_site\_fract\_x

\_atom\_site\_fract\_y

\_atom\_site\_fract\_z

\_atom\_site\_adp\_type

\_atom\_site\_U\_iso\_or\_equiv

\_atom\_site\_type\_symbol

|      |     |           |           |           |      |      |
|------|-----|-----------|-----------|-----------|------|------|
| Mo1  | 1.0 | 1.620565  | 3.888989  | 2.922054  | Uiso | ? Mo |
| Mo2  | 1.0 | 1.666048  | 3.934155  | 9.436738  | Uiso | ? Mo |
| Mo3  | 1.0 | 1.666048  | 10.403831 | 2.922054  | Uiso | ? Mo |
| Mo4  | 1.0 | 1.711532  | 10.448997 | 9.436738  | Uiso | ? Mo |
| Mo5  | 1.0 | 8.135565  | 3.888989  | 2.922054  | Uiso | ? Mo |
| Mo6  | 1.0 | 8.181048  | 3.934155  | 9.436738  | Uiso | ? Mo |
| Mo7  | 1.0 | 8.181048  | 10.403831 | 2.922054  | Uiso | ? Mo |
| Mo8  | 1.0 | 8.226531  | 10.448997 | 9.436738  | Uiso | ? Mo |
| Mo9  | 1.0 | 5.208632  | 3.108353  | 4.026944  | Uiso | ? Mo |
| Mo10 | 1.0 | 5.254115  | 3.153520  | 10.541629 | Uiso | ? Mo |
| Mo11 | 1.0 | 5.254115  | 9.623194  | 4.026944  | Uiso | ? Mo |
| Mo12 | 1.0 | 5.299598  | 9.668360  | 10.541629 | Uiso | ? Mo |
| Mo13 | 1.0 | 11.723631 | 3.108353  | 4.026944  | Uiso | ? Mo |
| Mo14 | 1.0 | 11.769114 | 3.153520  | 10.541629 | Uiso | ? Mo |
| Mo15 | 1.0 | 11.769114 | 9.623194  | 4.026944  | Uiso | ? Mo |
| Mo16 | 1.0 | 11.814597 | 9.668360  | 10.541629 | Uiso | ? Mo |
| Mo17 | 1.0 | 2.852361  | 1.708520  | 3.868637  | Uiso | ? Mo |
| Mo18 | 1.0 | 2.897844  | 1.753686  | 10.383322 | Uiso | ? Mo |

|      |     |           |           |           |           |
|------|-----|-----------|-----------|-----------|-----------|
| Mo19 | 1.0 | 2.897844  | 8.223360  | 3.868637  | Uiso ? Mo |
| Mo20 | 1.0 | 2.943327  | 8.268527  | 10.383322 | Uiso ? Mo |
| Mo21 | 1.0 | 9.367361  | 1.708520  | 3.868637  | Uiso ? Mo |
| Mo22 | 1.0 | 9.412845  | 1.753686  | 10.383322 | Uiso ? Mo |
| Mo23 | 1.0 | 9.412845  | 8.223360  | 3.868637  | Uiso ? Mo |
| Mo24 | 1.0 | 9.458326  | 8.268527  | 10.383322 | Uiso ? Mo |
| Mo25 | 1.0 | 3.976836  | 5.288823  | 3.080360  | Uiso ? Mo |
| Mo26 | 1.0 | 4.022319  | 5.333989  | 9.595045  | Uiso ? Mo |
| Mo27 | 1.0 | 4.022319  | 11.803664 | 3.080360  | Uiso ? Mo |
| Mo28 | 1.0 | 4.067802  | 11.848830 | 9.595045  | Uiso ? Mo |
| Mo29 | 1.0 | 10.491836 | 5.288823  | 3.080360  | Uiso ? Mo |
| Mo30 | 1.0 | 10.537318 | 5.333989  | 9.595045  | Uiso ? Mo |
| Mo31 | 1.0 | 10.537318 | 11.803664 | 3.080360  | Uiso ? Mo |
| Mo32 | 1.0 | 10.582801 | 11.848830 | 9.595045  | Uiso ? Mo |
| Mo33 | 1.0 | 3.792382  | 2.933783  | 1.681658  | Uiso ? Mo |
| Mo34 | 1.0 | 3.837865  | 2.978949  | 8.196342  | Uiso ? Mo |
| Mo35 | 1.0 | 3.837865  | 9.448623  | 1.681658  | Uiso ? Mo |
| Mo36 | 1.0 | 3.883348  | 9.493791  | 8.196342  | Uiso ? Mo |
| Mo37 | 1.0 | 10.307382 | 2.933783  | 1.681658  | Uiso ? Mo |
| Mo38 | 1.0 | 10.352864 | 2.978949  | 8.196342  | Uiso ? Mo |
| Mo39 | 1.0 | 10.352864 | 9.448623  | 1.681658  | Uiso ? Mo |
| Mo40 | 1.0 | 10.398348 | 9.493791  | 8.196342  | Uiso ? Mo |
| Mo41 | 1.0 | 3.036815  | 4.063560  | 5.267340  | Uiso ? Mo |
| Mo42 | 1.0 | 3.082298  | 4.108726  | 11.782023 | Uiso ? Mo |
| Mo43 | 1.0 | 3.082298  | 10.578401 | 5.267340  | Uiso ? Mo |
| Mo44 | 1.0 | 3.127780  | 10.623567 | 11.782023 | Uiso ? Mo |
| Mo45 | 1.0 | 9.551814  | 4.063560  | 5.267340  | Uiso ? Mo |
| Mo46 | 1.0 | 9.597298  | 4.108726  | 11.782023 | Uiso ? Mo |
| Mo47 | 1.0 | 9.597298  | 10.578401 | 5.267340  | Uiso ? Mo |
| Mo48 | 1.0 | 9.642781  | 10.623567 | 11.782023 | Uiso ? Mo |

|     |     |           |           |           |          |
|-----|-----|-----------|-----------|-----------|----------|
| S1  | 1.0 | 4.974778  | 1.082086  | 2.689479  | Uiso ? S |
| S2  | 1.0 | 5.020261  | 1.127252  | 9.204164  | Uiso ? S |
| S3  | 1.0 | 5.020261  | 7.596926  | 2.689479  | Uiso ? S |
| S4  | 1.0 | 5.065744  | 7.642094  | 9.204164  | Uiso ? S |
| S5  | 1.0 | 11.489778 | 1.082086  | 2.689479  | Uiso ? S |
| S6  | 1.0 | 11.535261 | 1.127252  | 9.204164  | Uiso ? S |
| S7  | 1.0 | 11.535261 | 7.596926  | 2.689479  | Uiso ? S |
| S8  | 1.0 | 11.580744 | 7.642094  | 9.204164  | Uiso ? S |
| S9  | 1.0 | 1.854419  | 5.915257  | 4.259518  | Uiso ? S |
| S10 | 1.0 | 1.899902  | 5.960423  | 10.774202 | Uiso ? S |
| S11 | 1.0 | 1.899902  | 12.430097 | 4.259518  | Uiso ? S |
| S12 | 1.0 | 1.945385  | 12.475264 | 10.774202 | Uiso ? S |
| S13 | 1.0 | 8.369419  | 5.915257  | 4.259518  | Uiso ? S |
| S14 | 1.0 | 8.414902  | 5.960423  | 10.774202 | Uiso ? S |
| S15 | 1.0 | 8.414902  | 12.430097 | 4.259518  | Uiso ? S |
| S16 | 1.0 | 8.460385  | 12.475264 | 10.774202 | Uiso ? S |
| S17 | 1.0 | 2.623756  | 5.064410  | 1.063414  | Uiso ? S |
| S18 | 1.0 | 2.669239  | 5.109576  | 7.578098  | Uiso ? S |
| S19 | 1.0 | 2.669239  | 11.579250 | 1.063414  | Uiso ? S |
| S20 | 1.0 | 2.714722  | 11.624417 | 7.578098  | Uiso ? S |
| S21 | 1.0 | 9.138755  | 5.064410  | 1.063414  | Uiso ? S |
| S22 | 1.0 | 9.184238  | 5.109576  | 7.578098  | Uiso ? S |
| S23 | 1.0 | 9.184238  | 11.579250 | 1.063414  | Uiso ? S |
| S24 | 1.0 | 9.229721  | 11.624417 | 7.578098  | Uiso ? S |
| S25 | 1.0 | 4.205441  | 1.932932  | 5.885584  | Uiso ? S |
| S26 | 1.0 | 4.250924  | 1.978099  | 12.400268 | Uiso ? S |
| S27 | 1.0 | 4.250924  | 8.447773  | 5.885584  | Uiso ? S |
| S28 | 1.0 | 4.296407  | 8.492940  | 12.400268 | Uiso ? S |
| S29 | 1.0 | 10.720441 | 1.932932  | 5.885584  | Uiso ? S |
| S30 | 1.0 | 10.765924 | 1.978099  | 12.400268 | Uiso ? S |

|     |     |           |           |           |          |
|-----|-----|-----------|-----------|-----------|----------|
| S31 | 1.0 | 10.765924 | 8.447773  | 5.885584  | Uiso ? S |
| S32 | 1.0 | 10.811407 | 8.492940  | 12.400268 | Uiso ? S |
| S33 | 1.0 | 1.008964  | 2.724604  | 5.056915  | Uiso ? S |
| S34 | 1.0 | 1.054447  | 2.769770  | 11.571600 | Uiso ? S |
| S35 | 1.0 | 1.054447  | 9.239445  | 5.056915  | Uiso ? S |
| S36 | 1.0 | 1.099930  | 9.284612  | 11.571600 | Uiso ? S |
| S37 | 1.0 | 7.523964  | 2.724604  | 5.056915  | Uiso ? S |
| S38 | 1.0 | 7.569447  | 2.769770  | 11.571600 | Uiso ? S |
| S39 | 1.0 | 7.569447  | 9.239445  | 5.056915  | Uiso ? S |
| S40 | 1.0 | 7.614930  | 9.284612  | 11.571600 | Uiso ? S |
| S41 | 1.0 | 5.820232  | 4.272738  | 1.892082  | Uiso ? S |
| S42 | 1.0 | 5.865716  | 4.317905  | 8.406766  | Uiso ? S |
| S43 | 1.0 | 5.865716  | 10.787579 | 1.892082  | Uiso ? S |
| S44 | 1.0 | 5.911200  | 10.832746 | 8.406766  | Uiso ? S |
| S45 | 1.0 | 12.335232 | 4.272738  | 1.892082  | Uiso ? S |
| S46 | 1.0 | 12.380716 | 4.317905  | 8.406766  | Uiso ? S |
| S47 | 1.0 | 12.380716 | 10.787579 | 1.892082  | Uiso ? S |
| S48 | 1.0 | 12.426199 | 10.832746 | 8.406766  | Uiso ? S |
| S49 | 1.0 | 1.712902  | 1.808813  | 1.796316  | Uiso ? S |
| S50 | 1.0 | 1.758385  | 1.853980  | 8.311000  | Uiso ? S |
| S51 | 1.0 | 1.758385  | 8.323654  | 1.796316  | Uiso ? S |
| S52 | 1.0 | 1.803868  | 8.368821  | 8.311000  | Uiso ? S |
| S53 | 1.0 | 8.227901  | 1.808813  | 1.796316  | Uiso ? S |
| S54 | 1.0 | 8.273384  | 1.853980  | 8.311000  | Uiso ? S |
| S55 | 1.0 | 8.273384  | 8.323654  | 1.796316  | Uiso ? S |
| S56 | 1.0 | 8.318868  | 8.368821  | 8.311000  | Uiso ? S |
| S57 | 1.0 | 5.116295  | 5.188529  | 5.152681  | Uiso ? S |
| S58 | 1.0 | 5.161778  | 5.233696  | 11.667365 | Uiso ? S |
| S59 | 1.0 | 5.161778  | 11.703370 | 5.152681  | Uiso ? S |
| S60 | 1.0 | 5.207261  | 11.748536 | 11.667365 | Uiso ? S |

|      |     |           |           |           |           |
|------|-----|-----------|-----------|-----------|-----------|
| S61  | 1.0 | 11.631295 | 5.188529  | 5.152681  | Uiso ? S  |
| S62  | 1.0 | 11.676778 | 5.233696  | 11.667365 | Uiso ? S  |
| S63  | 1.0 | 11.676778 | 11.703370 | 5.152681  | Uiso ? S  |
| S64  | 1.0 | 11.722260 | 11.748536 | 11.667365 | Uiso ? S  |
| Sn65 | 1.0 | 0.111616  | 0.218667  | 0.217157  | Uiso ? Sn |
| Sn66 | 1.0 | 0.157098  | 0.263834  | 6.731841  | Uiso ? Sn |
| Sn67 | 1.0 | 0.157098  | 6.733509  | 0.217157  | Uiso ? Sn |
| Sn68 | 1.0 | 0.202582  | 6.778675  | 6.731841  | Uiso ? Sn |
| Sn69 | 1.0 | 6.626615  | 0.218667  | 0.217157  | Uiso ? Sn |
| Sn70 | 1.0 | 6.672099  | 0.263834  | 6.731841  | Uiso ? Sn |
| Sn71 | 1.0 | 6.672099  | 6.733509  | 0.217157  | Uiso ? Sn |
| Sn72 | 1.0 | 6.717581  | 6.778675  | 6.731841  | Uiso ? Sn |

### CIF file used for SnMo<sub>6</sub>S<sub>8</sub> MBXAS spectra generation

```
#=====
==
```

```
# CRYSTAL DATA
```

```
#-----
```

```
data_VESTA_phase_1
```

```
_chemical_name_common      'S Mo 2 x 2 x 2 supercell'
```

```
_cell_length_a             21.340961
```

```
_cell_length_b             21.340961
```

```
_cell_length_c             21.340961
```

```
_cell_angle_alpha          90.000000
```

```
_cell_angle_beta           90.000000
```

```
_cell_angle_gamma          90.000000
```

```
_cell_volume                1.000000
```

```
_space_group_name_H-M_alt  'P 1'
```

\_space\_group\_IT\_number 1

loop\_

\_space\_group\_symop\_operation\_xyz

'x, y, z'

loop\_

\_atom\_site\_label

\_atom\_site\_occupancy

\_atom\_site\_fract\_x

\_atom\_site\_fract\_y

\_atom\_site\_fract\_z

\_atom\_site\_adp\_type

\_atom\_site\_U\_iso\_or\_equiv

\_atom\_site\_type\_symbol

|      |     |          |          |          |      |      |
|------|-----|----------|----------|----------|------|------|
| Mo1  | 1.0 | 0.531552 | 0.566650 | 0.186713 | Uiso | ? Mo |
| Mo2  | 1.0 | 0.531552 | 0.316085 | 0.357747 | Uiso | ? Mo |
| Mo3  | 1.0 | 0.314556 | 0.691933 | 0.357747 | Uiso | ? Mo |
| Mo4  | 1.0 | 0.314556 | 0.441367 | 0.528780 | Uiso | ? Mo |
| Mo5  | 1.0 | 0.748548 | 0.691933 | 0.357747 | Uiso | ? Mo |
| Mo6  | 1.0 | 0.748548 | 0.441367 | 0.528780 | Uiso | ? Mo |
| Mo7  | 1.0 | 0.531552 | 0.817216 | 0.528780 | Uiso | ? Mo |
| Mo8  | 1.0 | 0.531552 | 0.566650 | 0.699814 | Uiso | ? Mo |
| Mo9  | 1.0 | 0.426503 | 0.494000 | 0.186713 | Uiso | ? Mo |
| Mo10 | 1.0 | 0.426503 | 0.243434 | 0.357747 | Uiso | ? Mo |
| Mo11 | 1.0 | 0.209507 | 0.619283 | 0.357747 | Uiso | ? Mo |
| Mo12 | 1.0 | 0.209507 | 0.368717 | 0.528780 | Uiso | ? Mo |
| Mo13 | 1.0 | 0.643499 | 0.619283 | 0.357747 | Uiso | ? Mo |
| Mo14 | 1.0 | 0.643499 | 0.368717 | 0.528780 | Uiso | ? Mo |
| Mo15 | 1.0 | 0.426503 | 0.744565 | 0.528780 | Uiso | ? Mo |



|      |     |          |          |          |           |
|------|-----|----------|----------|----------|-----------|
| Mo16 | 1.0 | 0.426503 | 0.494000 | 0.699814 | Uiso ? Mo |
| Mo17 | 1.0 | 0.458055 | 0.560650 | 0.300186 | Uiso ? Mo |
| Mo18 | 1.0 | 0.458055 | 0.310084 | 0.471220 | Uiso ? Mo |
| Mo19 | 1.0 | 0.241059 | 0.685933 | 0.471220 | Uiso ? Mo |
| Mo20 | 1.0 | 0.241059 | 0.435367 | 0.642253 | Uiso ? Mo |
| Mo21 | 1.0 | 0.675051 | 0.685933 | 0.471220 | Uiso ? Mo |
| Mo22 | 1.0 | 0.675051 | 0.435367 | 0.642253 | Uiso ? Mo |
| Mo23 | 1.0 | 0.458055 | 0.811215 | 0.642253 | Uiso ? Mo |
| Mo24 | 1.0 | 0.458055 | 0.560650 | 0.813287 | Uiso ? Mo |
| Mo25 | 1.0 | 0.541945 | 0.439350 | 0.186713 | Uiso ? Mo |
| Mo26 | 1.0 | 0.541945 | 0.188785 | 0.357747 | Uiso ? Mo |
| Mo27 | 1.0 | 0.324949 | 0.564633 | 0.357747 | Uiso ? Mo |
| Mo28 | 1.0 | 0.324949 | 0.314067 | 0.528780 | Uiso ? Mo |
| Mo29 | 1.0 | 0.758941 | 0.564633 | 0.357747 | Uiso ? Mo |
| Mo30 | 1.0 | 0.758941 | 0.314067 | 0.528780 | Uiso ? Mo |
| Mo31 | 1.0 | 0.541945 | 0.689916 | 0.528780 | Uiso ? Mo |
| Mo32 | 1.0 | 0.541945 | 0.439350 | 0.699814 | Uiso ? Mo |
| Mo33 | 1.0 | 0.573497 | 0.506000 | 0.300186 | Uiso ? Mo |
| Mo34 | 1.0 | 0.573497 | 0.255435 | 0.471220 | Uiso ? Mo |
| Mo35 | 1.0 | 0.356501 | 0.631283 | 0.471220 | Uiso ? Mo |
| Mo36 | 1.0 | 0.356501 | 0.380717 | 0.642253 | Uiso ? Mo |
| Mo37 | 1.0 | 0.790493 | 0.631283 | 0.471220 | Uiso ? Mo |
| Mo38 | 1.0 | 0.790493 | 0.380717 | 0.642253 | Uiso ? Mo |
| Mo39 | 1.0 | 0.573497 | 0.756566 | 0.642253 | Uiso ? Mo |
| Mo40 | 1.0 | 0.573497 | 0.506000 | 0.813287 | Uiso ? Mo |
| Mo41 | 1.0 | 0.468448 | 0.433350 | 0.300186 | Uiso ? Mo |
| Mo42 | 1.0 | 0.468448 | 0.182784 | 0.471220 | Uiso ? Mo |
| Mo43 | 1.0 | 0.251452 | 0.558633 | 0.471220 | Uiso ? Mo |
| Mo44 | 1.0 | 0.251452 | 0.308067 | 0.642253 | Uiso ? Mo |
| Mo45 | 1.0 | 0.685444 | 0.558633 | 0.471220 | Uiso ? Mo |

|      |     |          |          |          |           |
|------|-----|----------|----------|----------|-----------|
| Mo46 | 1.0 | 0.685444 | 0.308067 | 0.642253 | Uiso ? Mo |
| Mo47 | 1.0 | 0.468448 | 0.683915 | 0.642253 | Uiso ? Mo |
| Mo48 | 1.0 | 0.468448 | 0.433350 | 0.813287 | Uiso ? Mo |
| S1   | 1.0 | 0.424948 | 0.607433 | 0.201375 | Uiso ? S  |
| S2   | 1.0 | 0.424948 | 0.356867 | 0.372408 | Uiso ? S  |
| S3   | 1.0 | 0.207952 | 0.732716 | 0.372408 | Uiso ? S  |
| S4   | 1.0 | 0.207952 | 0.482150 | 0.543442 | Uiso ? S  |
| S5   | 1.0 | 0.641944 | 0.732716 | 0.372408 | Uiso ? S  |
| S6   | 1.0 | 0.641944 | 0.482150 | 0.543442 | Uiso ? S  |
| S7   | 1.0 | 0.424948 | 0.857998 | 0.543442 | Uiso ? S  |
| S8   | 1.0 | 0.424948 | 0.607433 | 0.714475 | Uiso ? S  |
| S9   | 1.0 | 0.500000 | 0.500000 | 0.100000 | Uiso ? S  |
| S10  | 1.0 | 0.500000 | 0.249435 | 0.271033 | Uiso ? S  |
| S11  | 1.0 | 0.283004 | 0.625283 | 0.271033 | Uiso ? S  |
| S12  | 1.0 | 0.283004 | 0.374717 | 0.442067 | Uiso ? S  |
| S13  | 1.0 | 0.716996 | 0.625283 | 0.271033 | Uiso ? S  |
| S14  | 1.0 | 0.716996 | 0.374717 | 0.442067 | Uiso ? S  |
| S15  | 1.0 | 0.500000 | 0.750566 | 0.442067 | Uiso ? S  |
| S16  | 1.0 | 0.500000 | 0.500000 | 0.613101 | Uiso ? S  |
| S17  | 1.0 | 0.555514 | 0.618714 | 0.285525 | Uiso ? S  |
| S18  | 1.0 | 0.555514 | 0.368148 | 0.456558 | Uiso ? S  |
| S19  | 1.0 | 0.338518 | 0.743996 | 0.456558 | Uiso ? S  |
| S20  | 1.0 | 0.338518 | 0.493431 | 0.627592 | Uiso ? S  |
| S21  | 1.0 | 0.772510 | 0.743996 | 0.456558 | Uiso ? S  |
| S22  | 1.0 | 0.772510 | 0.493431 | 0.627592 | Uiso ? S  |
| S23  | 1.0 | 0.555514 | 0.869279 | 0.627592 | Uiso ? S  |
| S24  | 1.0 | 0.555514 | 0.618714 | 0.798625 | Uiso ? S  |
| S25  | 1.0 | 0.630566 | 0.511281 | 0.201375 | Uiso ? S  |
| S26  | 1.0 | 0.630566 | 0.260715 | 0.372408 | Uiso ? S  |
| S27  | 1.0 | 0.413570 | 0.636563 | 0.372408 | Uiso ? S  |

|     |     |          |          |          |          |
|-----|-----|----------|----------|----------|----------|
| S28 | 1.0 | 0.413570 | 0.385998 | 0.543442 | Uiso ? S |
| S29 | 1.0 | 0.847562 | 0.636563 | 0.372408 | Uiso ? S |
| S30 | 1.0 | 0.847562 | 0.385998 | 0.543442 | Uiso ? S |
| S31 | 1.0 | 0.630566 | 0.761846 | 0.543442 | Uiso ? S |
| S32 | 1.0 | 0.630566 | 0.511281 | 0.714475 | Uiso ? S |
| S33 | 1.0 | 0.369434 | 0.488719 | 0.285525 | Uiso ? S |
| S34 | 1.0 | 0.369434 | 0.238154 | 0.456558 | Uiso ? S |
| S35 | 1.0 | 0.152438 | 0.614002 | 0.456558 | Uiso ? S |
| S36 | 1.0 | 0.152438 | 0.363437 | 0.627592 | Uiso ? S |
| S37 | 1.0 | 0.586430 | 0.614002 | 0.456558 | Uiso ? S |
| S38 | 1.0 | 0.586430 | 0.363437 | 0.627592 | Uiso ? S |
| S39 | 1.0 | 0.369434 | 0.739285 | 0.627592 | Uiso ? S |
| S40 | 1.0 | 0.369434 | 0.488719 | 0.798625 | Uiso ? S |
| S41 | 1.0 | 0.444486 | 0.381286 | 0.201375 | Uiso ? S |
| S42 | 1.0 | 0.444486 | 0.130721 | 0.372408 | Uiso ? S |
| S43 | 1.0 | 0.227490 | 0.506569 | 0.372408 | Uiso ? S |
| S44 | 1.0 | 0.227490 | 0.256004 | 0.543442 | Uiso ? S |
| S45 | 1.0 | 0.661482 | 0.506569 | 0.372408 | Uiso ? S |
| S46 | 1.0 | 0.661482 | 0.256004 | 0.543442 | Uiso ? S |
| S47 | 1.0 | 0.444486 | 0.631852 | 0.543442 | Uiso ? S |
| S48 | 1.0 | 0.444486 | 0.381286 | 0.714475 | Uiso ? S |
| S49 | 1.0 | 0.500000 | 0.500000 | 0.386900 | Uiso ? S |
| S50 | 1.0 | 0.500000 | 0.249435 | 0.557933 | Uiso ? S |
| S51 | 1.0 | 0.283004 | 0.625283 | 0.557933 | Uiso ? S |
| S52 | 1.0 | 0.283004 | 0.374717 | 0.728966 | Uiso ? S |
| S53 | 1.0 | 0.716996 | 0.625283 | 0.557933 | Uiso ? S |
| S54 | 1.0 | 0.716996 | 0.374717 | 0.728966 | Uiso ? S |
| S55 | 1.0 | 0.500000 | 0.750566 | 0.728966 | Uiso ? S |
| S56 | 1.0 | 0.500000 | 0.500000 | 0.900000 | Uiso ? S |
| S57 | 1.0 | 0.575052 | 0.392567 | 0.285525 | Uiso ? S |

|     |     |          |          |          |          |
|-----|-----|----------|----------|----------|----------|
| S58 | 1.0 | 0.575052 | 0.142002 | 0.456558 | Uiso ? S |
| S59 | 1.0 | 0.358056 | 0.517850 | 0.456558 | Uiso ? S |
| S60 | 1.0 | 0.358056 | 0.267284 | 0.627592 | Uiso ? S |
| S61 | 1.0 | 0.792048 | 0.517850 | 0.456558 | Uiso ? S |
| S62 | 1.0 | 0.792048 | 0.267284 | 0.627592 | Uiso ? S |
| S63 | 1.0 | 0.575052 | 0.643133 | 0.627592 | Uiso ? S |
| S64 | 1.0 | 0.575052 | 0.392567 | 0.798625 | Uiso ? S |

### Charge cube CIF for $\text{CuMo}_6\text{S}_8$ used for isosurface visualization

```
#=====
==
```

```
# CRYSTAL DATA
```

```
#-----
```

```
data_VESTA_phase_1
```

```
_chemical_name_common          ' Cubefile created from PWScf calculati'
```

```
_cell_length_a                 12.879404
```

```
_cell_length_b                 12.795889
```

```
_cell_length_c                 12.891242
```

```
_cell_angle_alpha              92.914185
```

```
_cell_angle_beta               96.028168
```

```
_cell_angle_gamma              93.576447
```

```
_cell_volume                    2105.130233
```

```
_space_group_name_H-M_alt      'P 1'
```

```
_space_group_IT_number         1
```

```
loop_
```

```
_space_group_symop_operation_xyz
```

```
'x, y, z'
```

loop\_

\_atom\_site\_label

\_atom\_site\_occupancy

\_atom\_site\_fract\_x

\_atom\_site\_fract\_y

\_atom\_site\_fract\_z

\_atom\_site\_adp\_type

\_atom\_site\_U\_iso\_or\_equiv

\_atom\_site\_type\_symbol

#=====

# CRYSTAL DATA

#-----

data\_VESTA\_phase\_2

\_chemical\_name\_common ' Cubefile created from PWScf calculati'

\_cell\_length\_a 1.000000

\_cell\_length\_b 1.000000

\_cell\_length\_c 1.000000

\_cell\_angle\_alpha 90.000000

\_cell\_angle\_beta 90.000000

\_cell\_angle\_gamma 90.000000

\_cell\_volume 1.000000

\_space\_group\_name\_H-M\_alt 'P 1'

\_space\_group\_IT\_number 1

loop\_

\_space\_group\_symop\_operation\_xyz

'x, y, z'

loop\_

\_atom\_site\_label

\_atom\_site\_occupancy

\_atom\_site\_fract\_x

\_atom\_site\_fract\_y

\_atom\_site\_fract\_z

\_atom\_site\_adp\_type

\_atom\_site\_U\_iso\_or\_equiv

\_atom\_site\_type\_symbol

|      |     |           |           |           |      |      |
|------|-----|-----------|-----------|-----------|------|------|
| Cu1  | 1.0 | 5.323076  | -0.044567 | 5.681606  | Uiso | ? Cu |
| Cu2  | 1.0 | 4.658623  | -0.586291 | 12.069981 | Uiso | ? Cu |
| Cu3  | 1.0 | 5.502198  | 6.346648  | 5.914006  | Uiso | ? Cu |
| Cu4  | 1.0 | 4.837744  | 5.804924  | 12.302381 | Uiso | ? Cu |
| Cu5  | 1.0 | 11.736313 | -0.624100 | 5.617155  | Uiso | ? Cu |
| Cu6  | 1.0 | 11.071860 | -1.165824 | 12.005528 | Uiso | ? Cu |
| Cu7  | 1.0 | 11.915436 | 5.767114  | 5.849555  | Uiso | ? Cu |
| Cu8  | 1.0 | 11.250982 | 5.225390  | 12.237929 | Uiso | ? Cu |
| Mo1  | 1.0 | 1.001386  | 3.273633  | 2.553805  | Uiso | ? Mo |
| Mo2  | 1.0 | 0.336933  | 2.731910  | 8.942180  | Uiso | ? Mo |
| Mo3  | 1.0 | 1.180508  | 9.664847  | 2.786206  | Uiso | ? Mo |
| Mo4  | 1.0 | 0.516055  | 9.123123  | 9.174580  | Uiso | ? Mo |
| Mo5  | 1.0 | 7.414623  | 2.694100  | 2.489354  | Uiso | ? Mo |
| Mo6  | 1.0 | 6.750170  | 2.152376  | 8.877728  | Uiso | ? Mo |
| Mo7  | 1.0 | 7.593745  | 9.085315  | 2.721755  | Uiso | ? Mo |
| Mo8  | 1.0 | 6.929293  | 8.543591  | 9.110128  | Uiso | ? Mo |
| Mo9  | 1.0 | 4.546056  | 2.248974  | 3.769591  | Uiso | ? Mo |
| Mo10 | 1.0 | 3.881603  | 1.707250  | 10.157965 | Uiso | ? Mo |
| Mo11 | 1.0 | 4.725178  | 8.640188  | 4.001991  | Uiso | ? Mo |

|      |     |           |           |           |           |
|------|-----|-----------|-----------|-----------|-----------|
| Mo12 | 1.0 | 4.060725  | 8.098464  | 10.390366 | Uiso ? Mo |
| Mo13 | 1.0 | 10.959294 | 1.669440  | 3.705139  | Uiso ? Mo |
| Mo14 | 1.0 | 10.294841 | 1.127716  | 10.093513 | Uiso ? Mo |
| Mo15 | 1.0 | 11.138415 | 8.060655  | 3.937540  | Uiso ? Mo |
| Mo16 | 1.0 | 10.473963 | 7.518930  | 10.325913 | Uiso ? Mo |
| Mo17 | 1.0 | 2.084497  | 0.951167  | 3.386804  | Uiso ? Mo |
| Mo18 | 1.0 | 1.420044  | 0.409443  | 9.775178  | Uiso ? Mo |
| Mo19 | 1.0 | 2.263619  | 7.342381  | 3.619204  | Uiso ? Mo |
| Mo20 | 1.0 | 1.599167  | 6.800658  | 10.007579 | Uiso ? Mo |
| Mo21 | 1.0 | 8.497736  | 0.371634  | 3.322352  | Uiso ? Mo |
| Mo22 | 1.0 | 7.833282  | -0.170090 | 9.710727  | Uiso ? Mo |
| Mo23 | 1.0 | 8.676857  | 6.762848  | 3.554753  | Uiso ? Mo |
| Mo24 | 1.0 | 8.012403  | 6.221124  | 9.943127  | Uiso ? Mo |
| Mo25 | 1.0 | 3.448719  | 4.556499  | 2.945868  | Uiso ? Mo |
| Mo26 | 1.0 | 2.784266  | 4.014775  | 9.334242  | Uiso ? Mo |
| Mo27 | 1.0 | 3.627841  | 10.947714 | 3.178268  | Uiso ? Mo |
| Mo28 | 1.0 | 2.963388  | 10.405990 | 9.566644  | Uiso ? Mo |
| Mo29 | 1.0 | 9.861957  | 3.976966  | 2.881416  | Uiso ? Mo |
| Mo30 | 1.0 | 9.197503  | 3.435241  | 9.269791  | Uiso ? Mo |
| Mo31 | 1.0 | 10.041079 | 10.368180 | 3.113817  | Uiso ? Mo |
| Mo32 | 1.0 | 9.376626  | 9.826456  | 9.502192  | Uiso ? Mo |
| Mo33 | 1.0 | 3.192998  | 2.293554  | 1.310078  | Uiso ? Mo |
| Mo34 | 1.0 | 2.528545  | 1.751831  | 7.698452  | Uiso ? Mo |
| Mo35 | 1.0 | 3.372120  | 8.684769  | 1.542478  | Uiso ? Mo |
| Mo36 | 1.0 | 2.707667  | 8.143045  | 7.930853  | Uiso ? Mo |
| Mo37 | 1.0 | 9.606236  | 1.714021  | 1.245626  | Uiso ? Mo |
| Mo38 | 1.0 | 8.941782  | 1.172297  | 7.634001  | Uiso ? Mo |
| Mo39 | 1.0 | 9.785358  | 8.105236  | 1.478027  | Uiso ? Mo |
| Mo40 | 1.0 | 9.120904  | 7.563511  | 7.866402  | Uiso ? Mo |
| Mo41 | 1.0 | 2.330428  | 3.239700  | 5.040088  | Uiso ? Mo |

|      |     |           |           |           |           |
|------|-----|-----------|-----------|-----------|-----------|
| Mo42 | 1.0 | 1.665974  | 2.697976  | 11.428462 | Uiso ? Mo |
| Mo43 | 1.0 | 2.509550  | 9.630915  | 5.272488  | Uiso ? Mo |
| Mo44 | 1.0 | 1.845096  | 9.089190  | 11.660862 | Uiso ? Mo |
| Mo45 | 1.0 | 8.743665  | 2.660167  | 4.975636  | Uiso ? Mo |
| Mo46 | 1.0 | 8.079212  | 2.118443  | 11.364011 | Uiso ? Mo |
| Mo47 | 1.0 | 8.922788  | 9.051381  | 5.208036  | Uiso ? Mo |
| Mo48 | 1.0 | 8.258334  | 8.509657  | 11.596411 | Uiso ? Mo |
| S1   | 1.0 | 0.304553  | 2.059187  | 4.607966  | Uiso ? S  |
| S2   | 1.0 | -0.359900 | 1.517463  | 10.996341 | Uiso ? S  |
| S3   | 1.0 | 0.483675  | 8.450400  | 4.840367  | Uiso ? S  |
| S4   | 1.0 | -0.180778 | 7.908677  | 11.228741 | Uiso ? S  |
| S5   | 1.0 | 6.717791  | 1.479653  | 4.543515  | Uiso ? S  |
| S6   | 1.0 | 6.053337  | 0.937930  | 10.931890 | Uiso ? S  |
| S7   | 1.0 | 6.896913  | 7.870868  | 4.775915  | Uiso ? S  |
| S8   | 1.0 | 6.232460  | 7.329144  | 11.164289 | Uiso ? S  |
| S9   | 1.0 | 5.239118  | 3.447085  | 1.736197  | Uiso ? S  |
| S10  | 1.0 | 4.574665  | 2.905361  | 8.124573  | Uiso ? S  |
| S11  | 1.0 | 5.418239  | 9.838300  | 1.968598  | Uiso ? S  |
| S12  | 1.0 | 4.753786  | 9.296576  | 8.356973  | Uiso ? S  |
| S13  | 1.0 | 11.652355 | 2.867552  | 1.671746  | Uiso ? S  |
| S14  | 1.0 | 10.987902 | 2.325828  | 8.060122  | Uiso ? S  |
| S15  | 1.0 | 11.831477 | 9.258766  | 1.904147  | Uiso ? S  |
| S16  | 1.0 | 11.167024 | 8.717042  | 8.292521  | Uiso ? S  |
| S17  | 1.0 | 4.220174  | 0.354930  | 2.335080  | Uiso ? S  |
| S18  | 1.0 | 3.555721  | -0.186794 | 8.723454  | Uiso ? S  |
| S19  | 1.0 | 4.399296  | 6.746145  | 2.567480  | Uiso ? S  |
| S20  | 1.0 | 3.734843  | 6.204421  | 8.955855  | Uiso ? S  |
| S21  | 1.0 | 10.633411 | -0.224603 | 2.270628  | Uiso ? S  |
| S22  | 1.0 | 9.968959  | -0.766327 | 8.659003  | Uiso ? S  |
| S23  | 1.0 | 10.812533 | 6.166611  | 2.503029  | Uiso ? S  |



|     |     |           |           |           |          |
|-----|-----|-----------|-----------|-----------|----------|
| S24 | 1.0 | 10.148081 | 5.624887  | 8.891404  | Uiso ? S |
| S25 | 1.0 | 1.306110  | 5.155812  | 3.999154  | Uiso ? S |
| S26 | 1.0 | 0.641656  | 4.614088  | 10.387527 | Uiso ? S |
| S27 | 1.0 | 1.485232  | 11.547027 | 4.231555  | Uiso ? S |
| S28 | 1.0 | 0.820779  | 11.005302 | 10.619929 | Uiso ? S |
| S29 | 1.0 | 7.719347  | 4.576278  | 3.934702  | Uiso ? S |
| S30 | 1.0 | 7.054894  | 4.034555  | 10.323077 | Uiso ? S |
| S31 | 1.0 | 7.898470  | 10.967493 | 4.167103  | Uiso ? S |
| S32 | 1.0 | 7.234016  | 10.425769 | 10.555477 | Uiso ? S |
| S33 | 1.0 | 2.246855  | 4.507870  | 0.864497  | Uiso ? S |
| S34 | 1.0 | 1.582401  | 3.966146  | 7.252872  | Uiso ? S |
| S35 | 1.0 | 2.425977  | 10.899084 | 1.096897  | Uiso ? S |
| S36 | 1.0 | 1.761523  | 10.357360 | 7.485271  | Uiso ? S |
| S37 | 1.0 | 8.660092  | 3.928336  | 0.800046  | Uiso ? S |
| S38 | 1.0 | 7.995639  | 3.386612  | 7.188420  | Uiso ? S |
| S39 | 1.0 | 8.839214  | 10.319551 | 1.032446  | Uiso ? S |
| S40 | 1.0 | 8.174761  | 9.777826  | 7.420821  | Uiso ? S |
| S41 | 1.0 | 3.242387  | 0.991796  | 5.486126  | Uiso ? S |
| S42 | 1.0 | 2.577933  | 0.450072  | 11.874500 | Uiso ? S |
| S43 | 1.0 | 3.421508  | 7.383010  | 5.718526  | Uiso ? S |
| S44 | 1.0 | 2.757056  | 6.841286  | 12.106901 | Uiso ? S |
| S45 | 1.0 | 9.655624  | 0.412262  | 5.421674  | Uiso ? S |
| S46 | 1.0 | 8.991171  | -0.129462 | 11.810049 | Uiso ? S |
| S47 | 1.0 | 9.834746  | 6.803476  | 5.654075  | Uiso ? S |
| S48 | 1.0 | 9.170294  | 6.261753  | 12.042450 | Uiso ? S |
| S49 | 1.0 | 0.987509  | 1.243901  | 1.183596  | Uiso ? S |
| S50 | 1.0 | 0.323056  | 0.702177  | 7.571970  | Uiso ? S |
| S51 | 1.0 | 1.166631  | 7.635116  | 1.415997  | Uiso ? S |
| S52 | 1.0 | 0.502178  | 7.093391  | 7.804371  | Uiso ? S |
| S53 | 1.0 | 7.400747  | 0.664368  | 1.119145  | Uiso ? S |

|     |     |           |           |           |          |
|-----|-----|-----------|-----------|-----------|----------|
| S54 | 1.0 | 6.736293  | 0.122644  | 7.507519  | Uiso ? S |
| S55 | 1.0 | 7.579869  | 7.055582  | 1.351545  | Uiso ? S |
| S56 | 1.0 | 6.915416  | 6.513858  | 7.739920  | Uiso ? S |
| S57 | 1.0 | 4.540906  | 4.323483  | 5.128391  | Uiso ? S |
| S58 | 1.0 | 3.876453  | 3.781760  | 11.516766 | Uiso ? S |
| S59 | 1.0 | 4.720028  | 10.714698 | 5.360792  | Uiso ? S |
| S60 | 1.0 | 4.055575  | 10.172975 | 11.749166 | Uiso ? S |
| S61 | 1.0 | 10.954144 | 3.743950  | 5.063940  | Uiso ? S |
| S62 | 1.0 | 10.289691 | 3.202226  | 11.452314 | Uiso ? S |
| S63 | 1.0 | 11.133265 | 10.135164 | 5.296340  | Uiso ? S |
| S64 | 1.0 | 10.468813 | 9.593441  | 11.684714 | Uiso ? S |

### Charge cube CIF for Cu<sub>2</sub>Mo<sub>6</sub>S<sub>8</sub> used for isosurface visualization

```
#=====
==
```

```
# CRYSTAL DATA
```

```
#-----
```

```
data_VESTA_phase_1
```

```
_chemical_name_common      ' Cubefile created from PWSef calculati'
```

```
_cell_length_a             13.102716
```

```
_cell_length_b             12.851088
```

```
_cell_length_c             13.097470
```

```
_cell_angle_alpha          92.436745
```

```
_cell_angle_beta           97.436829
```

```
_cell_angle_gamma          96.757301
```

```
_cell_volume                2167.926506
```

```
_space_group_name_H-M_alt   'P 1'
```

```
_space_group_IT_number      1
```

```
loop_
```

\_space\_group\_symop\_operation\_xyz  
'x, y, z'

loop\_

\_atom\_site\_label  
\_atom\_site\_occupancy  
\_atom\_site\_fract\_x  
\_atom\_site\_fract\_y  
\_atom\_site\_fract\_z  
\_atom\_site\_adp\_type  
\_atom\_site\_U\_iso\_or\_equiv  
\_atom\_site\_type\_symbol

#=====

# CRYSTAL DATA

#-----

data\_VESTA\_phase\_2

|                           |                                          |
|---------------------------|------------------------------------------|
| _chemical_name_common     | ' Cubefile created from PWScf calculati' |
| _cell_length_a            | 1.000000                                 |
| _cell_length_b            | 1.000000                                 |
| _cell_length_c            | 1.000000                                 |
| _cell_angle_alpha         | 90.000000                                |
| _cell_angle_beta          | 90.000000                                |
| _cell_angle_gamma         | 90.000000                                |
| _cell_volume              | 1.000000                                 |
| _space_group_name_H-M_alt | 'P 1'                                    |
| _space_group_IT_number    | 1                                        |

loop\_

\_space\_group\_symop\_operation\_xyz

'x, y, z'

loop\_

\_atom\_site\_label

\_atom\_site\_occupancy

\_atom\_site\_fract\_x

\_atom\_site\_fract\_y

\_atom\_site\_fract\_z

\_atom\_site\_adp\_type

\_atom\_site\_U\_iso\_or\_equiv

\_atom\_site\_type\_symbol

|      |     |           |           |           |      |      |
|------|-----|-----------|-----------|-----------|------|------|
| Cu1  | 1.0 | 5.386984  | 0.231946  | 5.790153  | Uiso | ? Cu |
| Cu2  | 1.0 | 4.630202  | -0.338562 | 12.269945 | Uiso | ? Cu |
| Cu3  | 1.0 | 4.933930  | 6.637179  | 6.025062  | Uiso | ? Cu |
| Cu4  | 1.0 | 4.177149  | 6.066671  | 12.504853 | Uiso | ? Cu |
| Cu5  | 1.0 | 11.930067 | -0.074159 | 5.670397  | Uiso | ? Cu |
| Cu6  | 1.0 | 11.173285 | -0.644667 | 12.150188 | Uiso | ? Cu |
| Cu7  | 1.0 | 11.477013 | 6.331074  | 5.905306  | Uiso | ? Cu |
| Cu8  | 1.0 | 10.720232 | 5.760566  | 12.385098 | Uiso | ? Cu |
| Cu9  | 1.0 | -0.053751 | 5.296657  | 0.804701  | Uiso | ? Cu |
| Cu10 | 1.0 | -0.810533 | 4.726149  | 7.284492  | Uiso | ? Cu |
| Cu11 | 1.0 | -0.506805 | 11.701889 | 1.039610  | Uiso | ? Cu |
| Cu12 | 1.0 | -1.263587 | 11.131381 | 7.519402  | Uiso | ? Cu |
| Cu13 | 1.0 | 6.489331  | 4.990552  | 0.684945  | Uiso | ? Cu |
| Cu14 | 1.0 | 5.732549  | 4.420044  | 7.164737  | Uiso | ? Cu |
| Cu15 | 1.0 | 6.036278  | 11.395784 | 0.919854  | Uiso | ? Cu |
| Cu16 | 1.0 | 5.279495  | 10.825276 | 7.399645  | Uiso | ? Cu |
| Mo1  | 1.0 | 0.885141  | 3.193749  | 2.691926  | Uiso | ? Mo |

|      |     |           |           |           |           |
|------|-----|-----------|-----------|-----------|-----------|
| Mo2  | 1.0 | 0.128359  | 2.623242  | 9.171718  | Uiso ? Mo |
| Mo3  | 1.0 | 0.432087  | 9.598982  | 2.926835  | Uiso ? Mo |
| Mo4  | 1.0 | -0.324695 | 9.028474  | 9.406627  | Uiso ? Mo |
| Mo5  | 1.0 | 7.428224  | 2.887645  | 2.572170  | Uiso ? Mo |
| Mo6  | 1.0 | 6.671442  | 2.317137  | 9.051961  | Uiso ? Mo |
| Mo7  | 1.0 | 6.975170  | 9.292877  | 2.807079  | Uiso ? Mo |
| Mo8  | 1.0 | 6.218388  | 8.722369  | 9.286871  | Uiso ? Mo |
| Mo9  | 1.0 | 4.448131  | 2.334890  | 3.903071  | Uiso ? Mo |
| Mo10 | 1.0 | 3.691349  | 1.764382  | 10.382863 | Uiso ? Mo |
| Mo11 | 1.0 | 3.995077  | 8.740122  | 4.137980  | Uiso ? Mo |
| Mo12 | 1.0 | 3.238295  | 8.169615  | 10.617772 | Uiso ? Mo |
| Mo13 | 1.0 | 10.991214 | 2.028785  | 3.783315  | Uiso ? Mo |
| Mo14 | 1.0 | 10.234431 | 1.458277  | 10.263107 | Uiso ? Mo |
| Mo15 | 1.0 | 10.538159 | 8.434018  | 4.018225  | Uiso ? Mo |
| Mo16 | 1.0 | 9.781378  | 7.863510  | 10.498015 | Uiso ? Mo |
| Mo17 | 1.0 | 2.155896  | 1.013641  | 3.526927  | Uiso ? Mo |
| Mo18 | 1.0 | 1.399115  | 0.443132  | 10.006720 | Uiso ? Mo |
| Mo19 | 1.0 | 1.702842  | 7.418873  | 3.761836  | Uiso ? Mo |
| Mo20 | 1.0 | 0.946061  | 6.848365  | 10.241628 | Uiso ? Mo |
| Mo21 | 1.0 | 8.698978  | 0.707536  | 3.407171  | Uiso ? Mo |
| Mo22 | 1.0 | 7.942197  | 0.137028  | 9.886963  | Uiso ? Mo |
| Mo23 | 1.0 | 8.245926  | 7.112769  | 3.642080  | Uiso ? Mo |
| Mo24 | 1.0 | 7.489143  | 6.542261  | 10.121871 | Uiso ? Mo |
| Mo25 | 1.0 | 3.177462  | 4.514933  | 3.067975  | Uiso ? Mo |
| Mo26 | 1.0 | 2.420681  | 3.944425  | 9.547767  | Uiso ? Mo |
| Mo27 | 1.0 | 2.724408  | 10.920166 | 3.302884  | Uiso ? Mo |
| Mo28 | 1.0 | 1.967627  | 10.349658 | 9.782677  | Uiso ? Mo |
| Mo29 | 1.0 | 9.720546  | 4.208828  | 2.948219  | Uiso ? Mo |
| Mo30 | 1.0 | 8.963763  | 3.638320  | 9.428012  | Uiso ? Mo |
| Mo31 | 1.0 | 9.267491  | 10.614060 | 3.183128  | Uiso ? Mo |

|      |     |           |           |           |           |
|------|-----|-----------|-----------|-----------|-----------|
| Mo32 | 1.0 | 8.510710  | 10.043552 | 9.662920  | Uiso ? Mo |
| Mo33 | 1.0 | 3.145613  | 2.313672  | 1.472751  | Uiso ? Mo |
| Mo34 | 1.0 | 2.388831  | 1.743164  | 7.952542  | Uiso ? Mo |
| Mo35 | 1.0 | 2.692559  | 8.718904  | 1.707660  | Uiso ? Mo |
| Mo36 | 1.0 | 1.935777  | 8.148396  | 8.187451  | Uiso ? Mo |
| Mo37 | 1.0 | 9.688696  | 2.007566  | 1.352995  | Uiso ? Mo |
| Mo38 | 1.0 | 8.931914  | 1.437058  | 7.832787  | Uiso ? Mo |
| Mo39 | 1.0 | 9.235641  | 8.412799  | 1.587904  | Uiso ? Mo |
| Mo40 | 1.0 | 8.478859  | 7.842291  | 8.067696  | Uiso ? Mo |
| Mo41 | 1.0 | 2.187652  | 3.214924  | 5.122167  | Uiso ? Mo |
| Mo42 | 1.0 | 1.430870  | 2.644416  | 11.601958 | Uiso ? Mo |
| Mo43 | 1.0 | 1.734598  | 9.620157  | 5.357076  | Uiso ? Mo |
| Mo44 | 1.0 | 0.977816  | 9.049649  | 11.836867 | Uiso ? Mo |
| Mo45 | 1.0 | 8.730734  | 2.908819  | 5.002411  | Uiso ? Mo |
| Mo46 | 1.0 | 7.973953  | 2.338311  | 11.482203 | Uiso ? Mo |
| Mo47 | 1.0 | 8.277681  | 9.314052  | 5.237320  | Uiso ? Mo |
| Mo48 | 1.0 | 7.520898  | 8.743544  | 11.717113 | Uiso ? Mo |
| S1   | 1.0 | 0.211213  | 1.926077  | 4.706327  | Uiso ? S  |
| S2   | 1.0 | -0.545570 | 1.355569  | 11.186119 | Uiso ? S  |
| S3   | 1.0 | -0.241841 | 8.331310  | 4.941236  | Uiso ? S  |
| S4   | 1.0 | -0.998623 | 7.760802  | 11.421028 | Uiso ? S  |
| S5   | 1.0 | 6.754295  | 1.619972  | 4.586571  | Uiso ? S  |
| S6   | 1.0 | 5.997513  | 1.049464  | 11.066362 | Uiso ? S  |
| S7   | 1.0 | 6.301241  | 8.025205  | 4.821480  | Uiso ? S  |
| S8   | 1.0 | 5.544459  | 7.454697  | 11.301272 | Uiso ? S  |
| S9   | 1.0 | 5.121930  | 3.602616  | 1.888635  | Uiso ? S  |
| S10  | 1.0 | 4.365148  | 3.032109  | 8.368427  | Uiso ? S  |
| S11  | 1.0 | 4.668876  | 10.007849 | 2.123544  | Uiso ? S  |
| S12  | 1.0 | 3.912094  | 9.437341  | 8.603336  | Uiso ? S  |
| S13  | 1.0 | 11.665012 | 3.296511  | 1.768879  | Uiso ? S  |

|     |     |           |           |           |          |
|-----|-----|-----------|-----------|-----------|----------|
| S14 | 1.0 | 10.908231 | 2.726003  | 8.248671  | Uiso ? S |
| S15 | 1.0 | 11.211959 | 9.701744  | 2.003788  | Uiso ? S |
| S16 | 1.0 | 10.455176 | 9.131235  | 8.483580  | Uiso ? S |
| S17 | 1.0 | 4.326624  | 0.448386  | 2.435904  | Uiso ? S |
| S18 | 1.0 | 3.569842  | -0.122122 | 8.915696  | Uiso ? S |
| S19 | 1.0 | 3.873570  | 6.853619  | 2.670813  | Uiso ? S |
| S20 | 1.0 | 3.116788  | 6.283111  | 9.150604  | Uiso ? S |
| S21 | 1.0 | 10.869707 | 0.142281  | 2.316148  | Uiso ? S |
| S22 | 1.0 | 10.112925 | -0.428227 | 8.795939  | Uiso ? S |
| S23 | 1.0 | 10.416653 | 6.547513  | 2.551057  | Uiso ? S |
| S24 | 1.0 | 9.659871  | 5.977005  | 9.030849  | Uiso ? S |
| S25 | 1.0 | 1.006600  | 5.080233  | 4.159067  | Uiso ? S |
| S26 | 1.0 | 0.249818  | 4.509725  | 10.638859 | Uiso ? S |
| S27 | 1.0 | 0.553546  | 11.485466 | 4.393975  | Uiso ? S |
| S28 | 1.0 | -0.203236 | 10.914958 | 10.873768 | Uiso ? S |
| S29 | 1.0 | 7.549683  | 4.774128  | 4.039311  | Uiso ? S |
| S30 | 1.0 | 6.792901  | 4.203619  | 10.519102 | Uiso ? S |
| S31 | 1.0 | 7.096629  | 11.179360 | 4.274220  | Uiso ? S |
| S32 | 1.0 | 6.339847  | 10.608852 | 10.754012 | Uiso ? S |
| S33 | 1.0 | 2.071905  | 4.488697  | 0.917428  | Uiso ? S |
| S34 | 1.0 | 1.315123  | 3.918189  | 7.397220  | Uiso ? S |
| S35 | 1.0 | 1.618851  | 10.893930 | 1.152337  | Uiso ? S |
| S36 | 1.0 | 0.862069  | 10.323422 | 7.632129  | Uiso ? S |
| S37 | 1.0 | 8.614987  | 4.182592  | 0.797672  | Uiso ? S |
| S38 | 1.0 | 7.858206  | 3.612084  | 7.277463  | Uiso ? S |
| S39 | 1.0 | 8.161934  | 10.587824 | 1.032581  | Uiso ? S |
| S40 | 1.0 | 7.405151  | 10.017317 | 7.512373  | Uiso ? S |
| S41 | 1.0 | 3.261354  | 1.039963  | 5.677551  | Uiso ? S |
| S42 | 1.0 | 2.504572  | 0.469456  | 12.157343 | Uiso ? S |
| S43 | 1.0 | 2.808300  | 7.445196  | 5.912459  | Uiso ? S |

|     |     |           |           |           |          |
|-----|-----|-----------|-----------|-----------|----------|
| S44 | 1.0 | 2.051518  | 6.874688  | 12.392251 | Uiso ? S |
| S45 | 1.0 | 9.804438  | 0.733859  | 5.557794  | Uiso ? S |
| S46 | 1.0 | 9.047655  | 0.163351  | 12.037586 | Uiso ? S |
| S47 | 1.0 | 9.351383  | 7.139091  | 5.792703  | Uiso ? S |
| S48 | 1.0 | 8.594602  | 6.568583  | 12.272494 | Uiso ? S |
| S49 | 1.0 | 1.003274  | 1.139694  | 1.297557  | Uiso ? S |
| S50 | 1.0 | 0.246492  | 0.569186  | 7.777349  | Uiso ? S |
| S51 | 1.0 | 0.550220  | 7.544926  | 1.532466  | Uiso ? S |
| S52 | 1.0 | -0.206562 | 6.974418  | 8.012259  | Uiso ? S |
| S53 | 1.0 | 7.546357  | 0.833588  | 1.177801  | Uiso ? S |
| S54 | 1.0 | 6.789575  | 0.263080  | 7.657593  | Uiso ? S |
| S55 | 1.0 | 7.093303  | 7.238822  | 1.412710  | Uiso ? S |
| S56 | 1.0 | 6.336521  | 6.668314  | 7.892502  | Uiso ? S |
| S57 | 1.0 | 4.329947  | 4.388886  | 5.297412  | Uiso ? S |
| S58 | 1.0 | 3.573165  | 3.818379  | 11.777205 | Uiso ? S |
| S59 | 1.0 | 3.876892  | 10.794119 | 5.532321  | Uiso ? S |
| S60 | 1.0 | 3.120111  | 10.223611 | 12.012114 | Uiso ? S |
| S61 | 1.0 | 10.873030 | 4.082781  | 5.177657  | Uiso ? S |
| S62 | 1.0 | 10.116247 | 3.512274  | 11.657448 | Uiso ? S |
| S63 | 1.0 | 10.419975 | 10.488014 | 5.412565  | Uiso ? S |
| S64 | 1.0 | 9.663194  | 9.917506  | 11.892357 | Uiso ? S |



## References

- 1 B. Ravel and M. Newville, *J. Synchrotron Radiat.*, 2005, **12**, 537–541.
- 2 M. Newville, *J. Synchrotron Radiat.*, 2001, **8**, 322–324.
- 3 M. Roy and S. J. Gurman, *J. Synchrotron Radiat.*, 1999, **6**, 228–230.
- 4 E. Levi and D. Aurbach, *Chem. Mater.*, 2010, **22**, 3678–3692.
- 5 G. Henkelman, A. Arnaldsson and H. Jónsson, *Comput. Mater. Sci.*, 2006, **36**, 354–360.
- 6 E. Sanville, S. D. Kenny, R. Smith and G. Henkelman, *J. Comput. Chem.*, 2007, **28**, 899–908.
- 7 W. Tang, E. Sanville and G. Henkelman, *J. Phys. Condens. Matter*, 2009, **21**, 084204.
- 8 M. Yu and D. R. Trinkle, *J. Chem. Phys.*, 2011, **134**, 064111.
- 9 Y. Liang, J. Vinson, S. Pemmaraju, W. S. Drisdell, E. L. Shirley and D. Prendergast, *Phys. Rev. Lett.*, 2017, **118**, 096402.
- 10 S. Roychoudhury and D. Prendergast, *Phys. Rev. B*, 2023, **107**, 035146.
- 11 F. P. Hyle, B. A. Wuille Bille, J. C. Ortíz-Rodríguez, A. Sanz-Matias, S. Roychoudhury, J. T. Perryman, C. J. Patridge, N. R. Singstock, C. B. Musgrave, D. Prendergast and J. M. Velázquez, *Phys. Chem. Chem. Phys.*, 2022, **24**, 17289–17294.
